# Supplementary material for: Interannual variability in the Australian carbon cycle over 2015–2019, based on assimilation of Orbiting Carbon Observatory-2 (OCO-2) satellite data
Source: Copernicus journal article supplement (doi:10.5194/acp-22-8897-2022), 2022-07-12
Supplement: Supplementary file 1 [file acp-22-8897-2022-supplement.pdf]

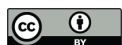

*Supplement of*

**Interannual variability in the Australian carbon cycle over 2015–2019, based on assimilation of Orbiting Carbon Observatory-2 (OCO-2) satellite data**

**Yohanna Villalobos et al.**

*Correspondence to:* Yohanna Villalobos ([yohanna.villaloboscortes@csiro.au](mailto:yohanna.villaloboscortes@csiro.au))

The copyright of individual parts of the supplement might differ from the article licence.

# Supplementary material

## 1 Spatial maps of OCO-2 soundings over Australia domain

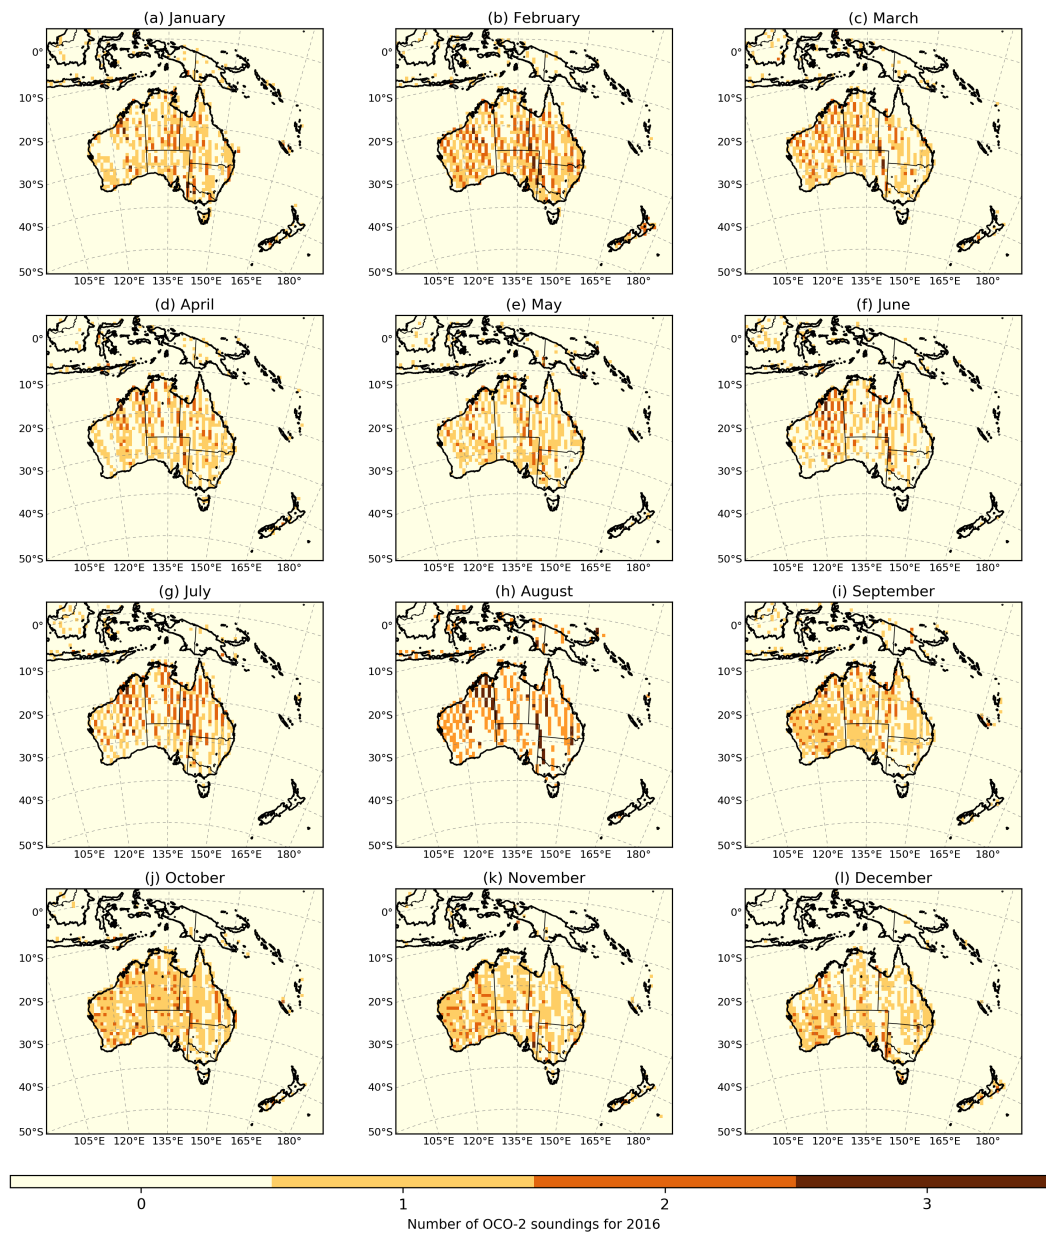

**Figure S1.** Spatial distribution of OCO-2 soundings (Land nadir and glint data) over the CMAQ domain for 2016.



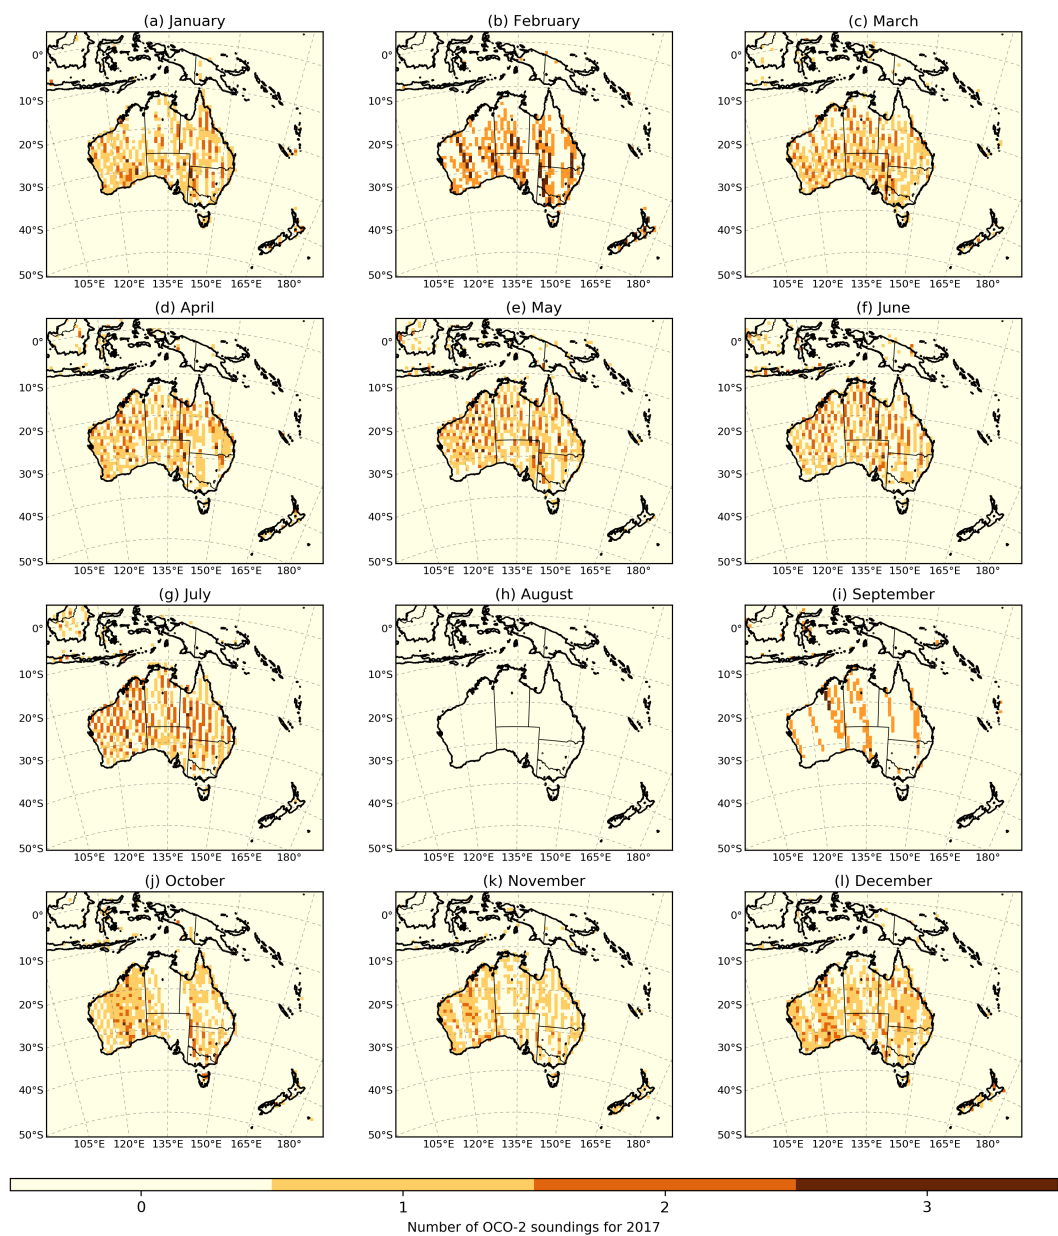

**Figure S2.** Spatial distribution of OCO-2 soundings (Land nadir and glint data) over the CMAQ domain for 2017.

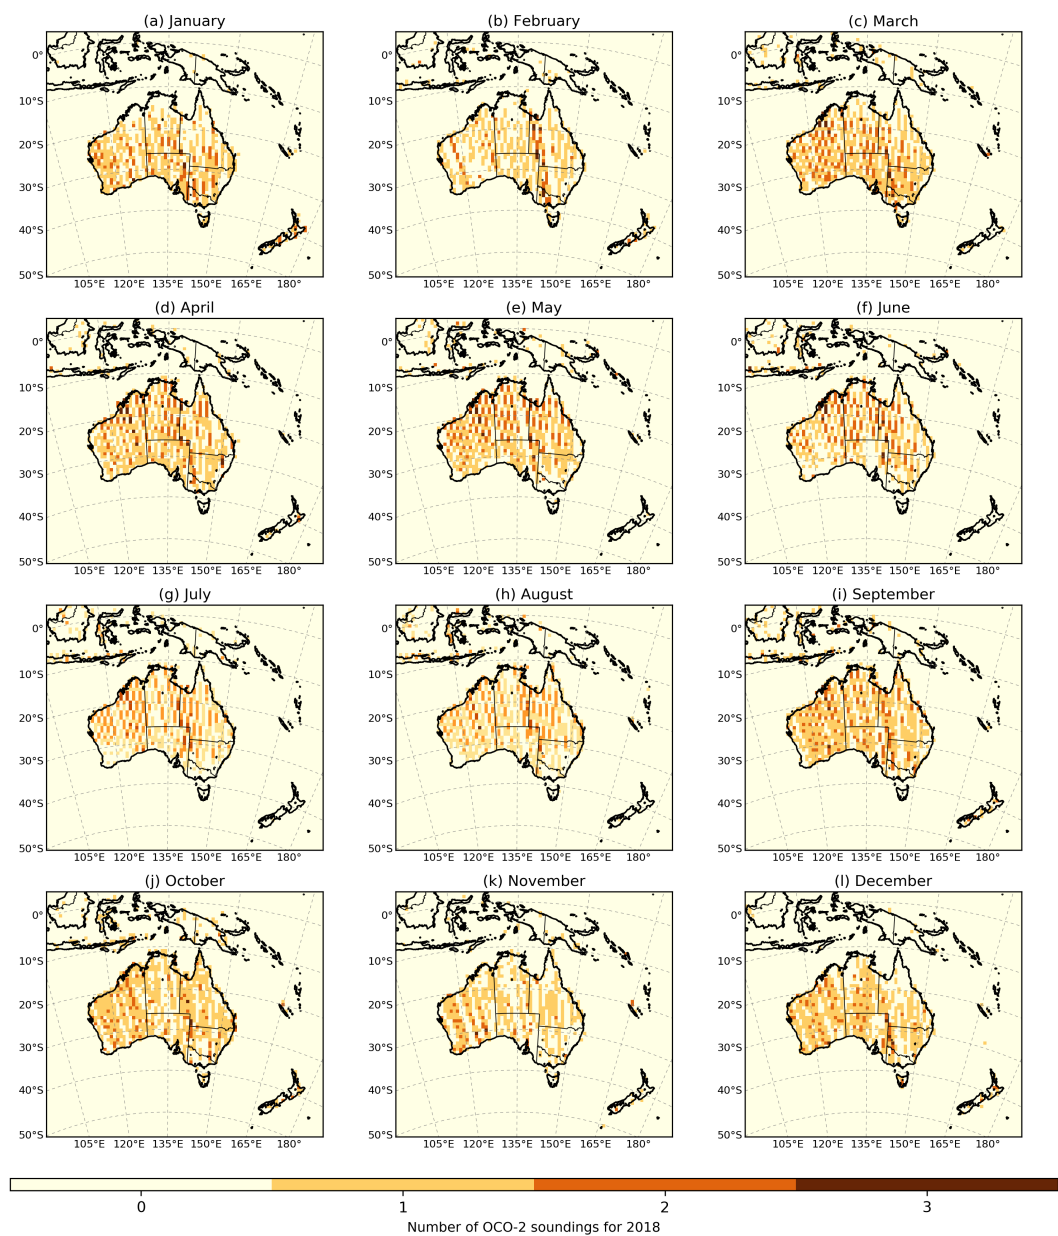

**Figure S3.** Spatial distribution of OCO-2 soundings (Land nadir and glint data) over the CMAQ domain for 2018.

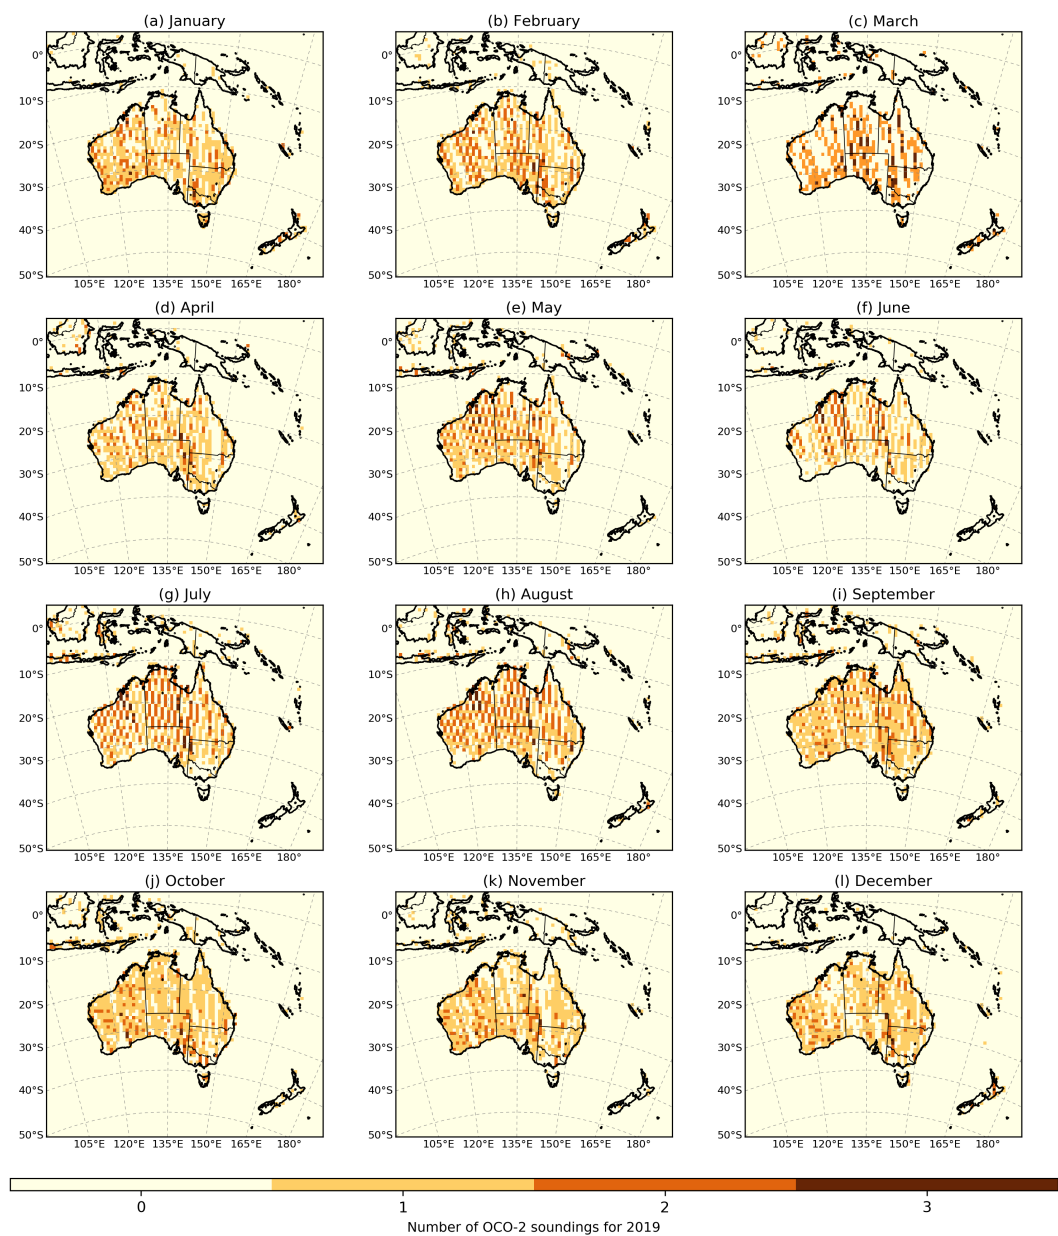

**Figure S4.** Spatial distribution of OCO-2 soundings (Land nadir and glint data) over the CMAQ domain for 2019.

2 Wind direction analysis

2.1 Wind directions at TCCON sites

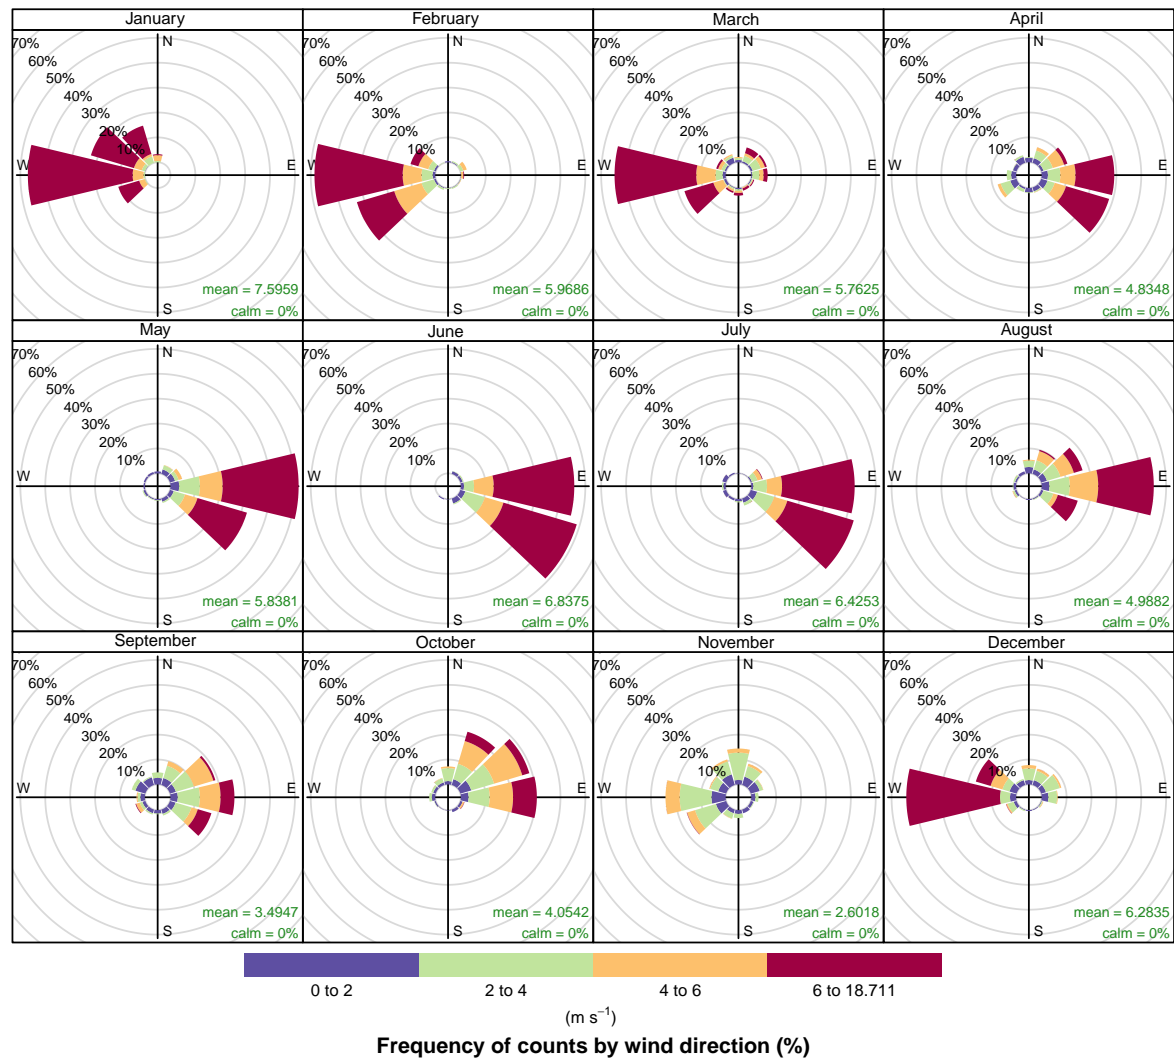

Figure S5. Wind rose TCCON Darwin location for 2015.

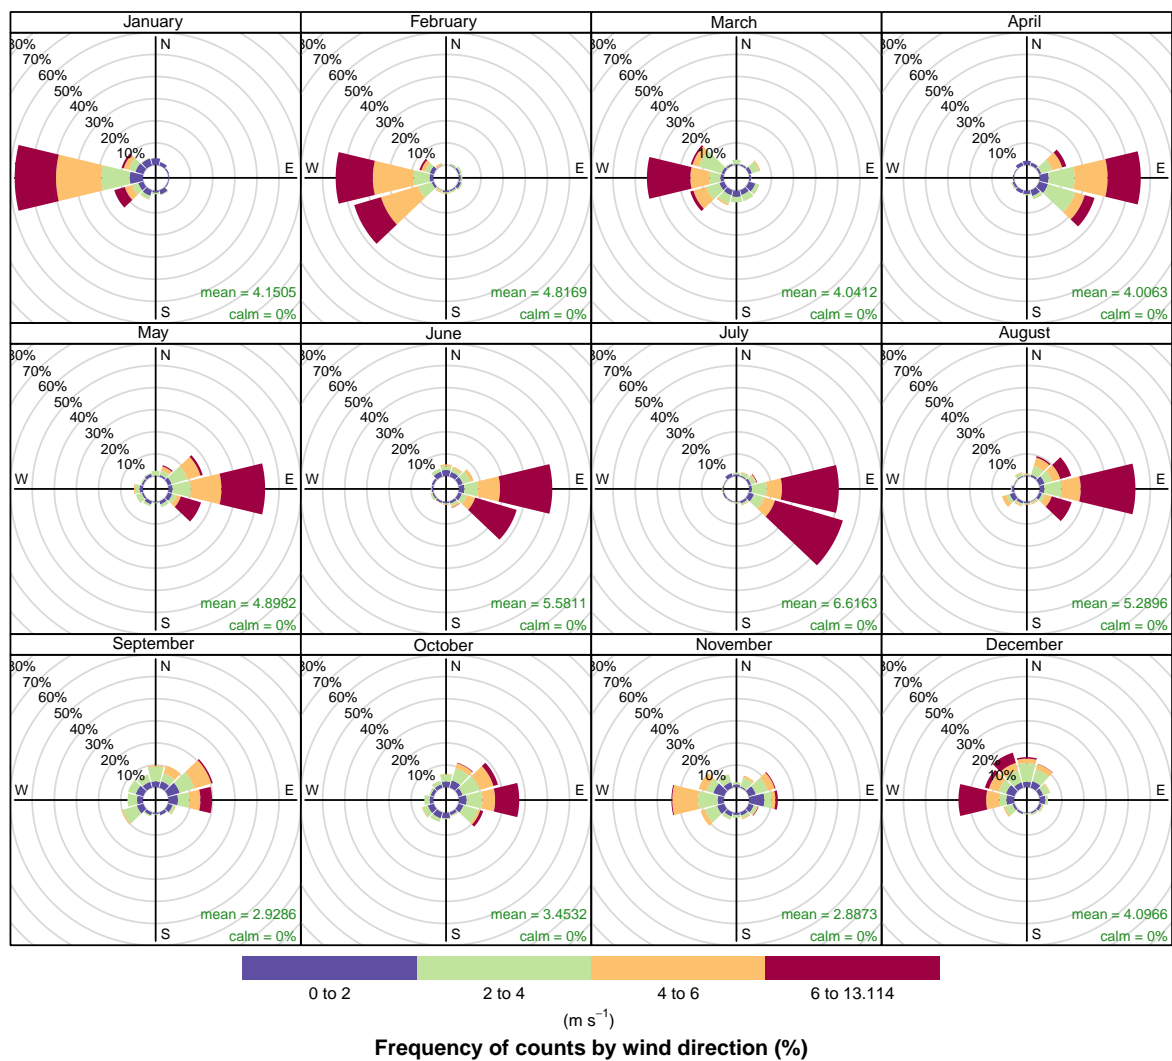

**Figure S6.** Wind rose TCCON Darwin location for 2016.

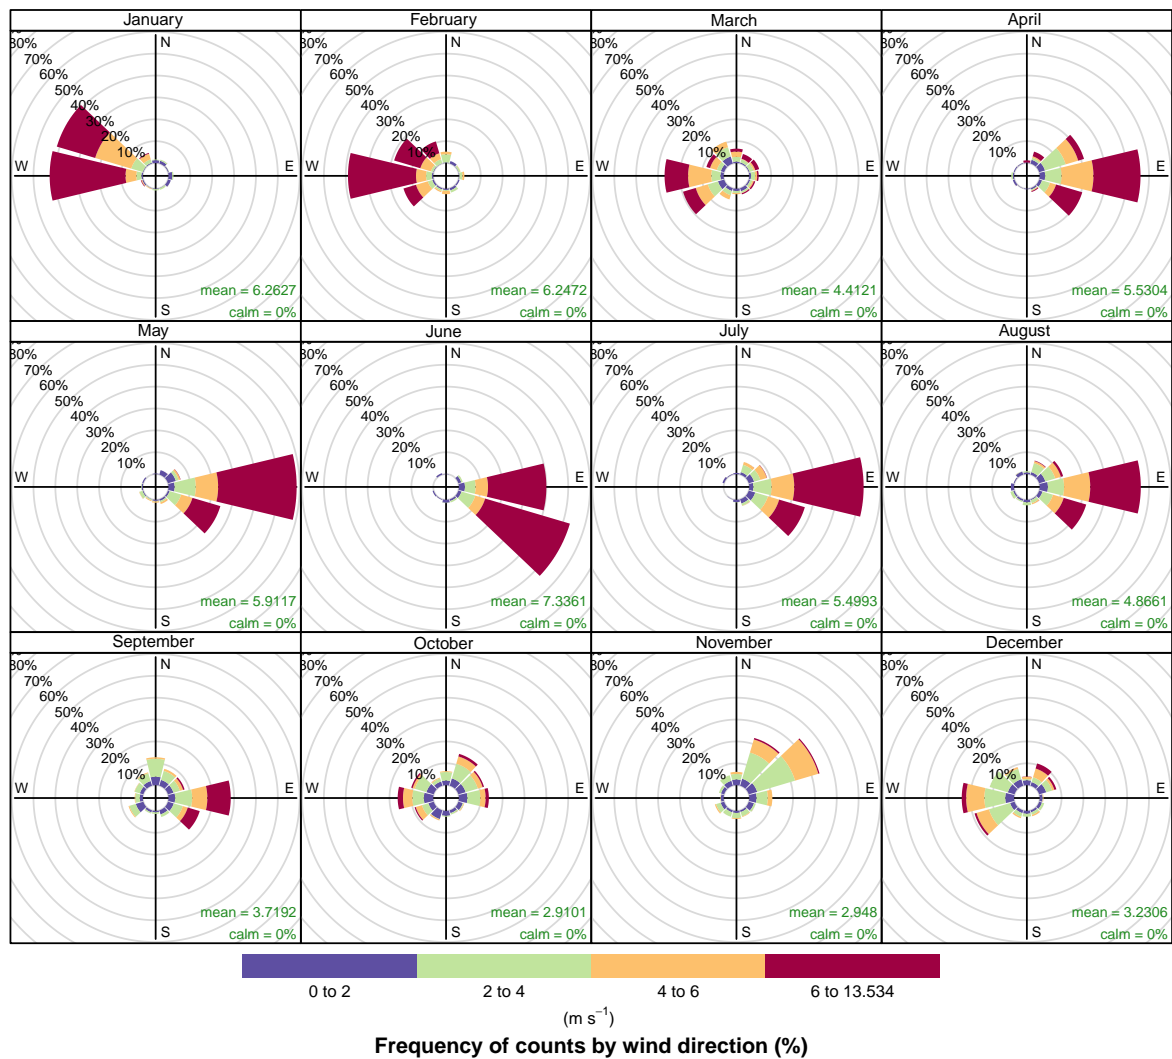

**Figure S7.** Wind rose TCCON Darwin Location for 2017.



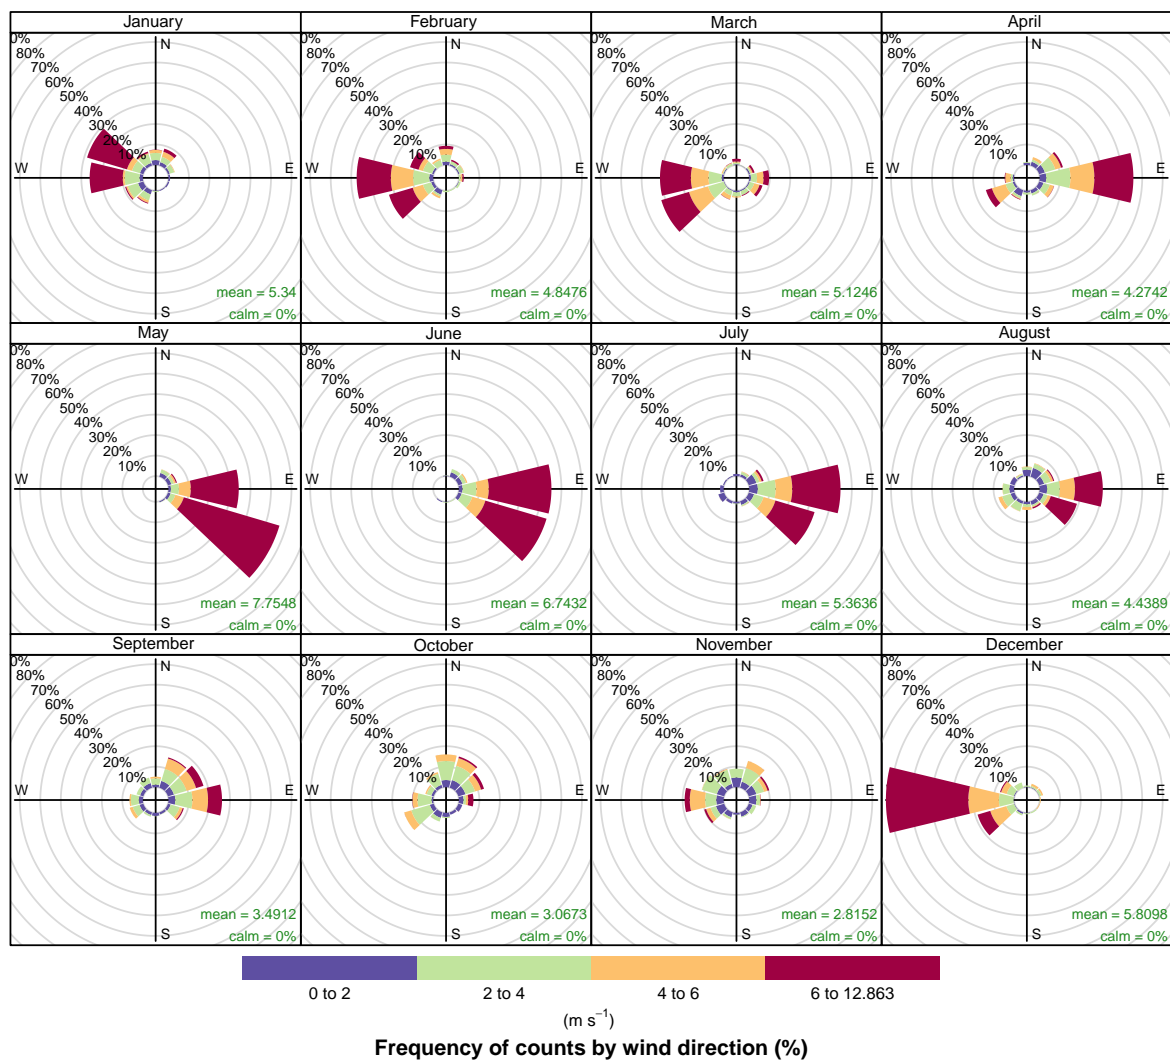

**Figure S8.** Wind rose TCCON Darwin Location for 2018.

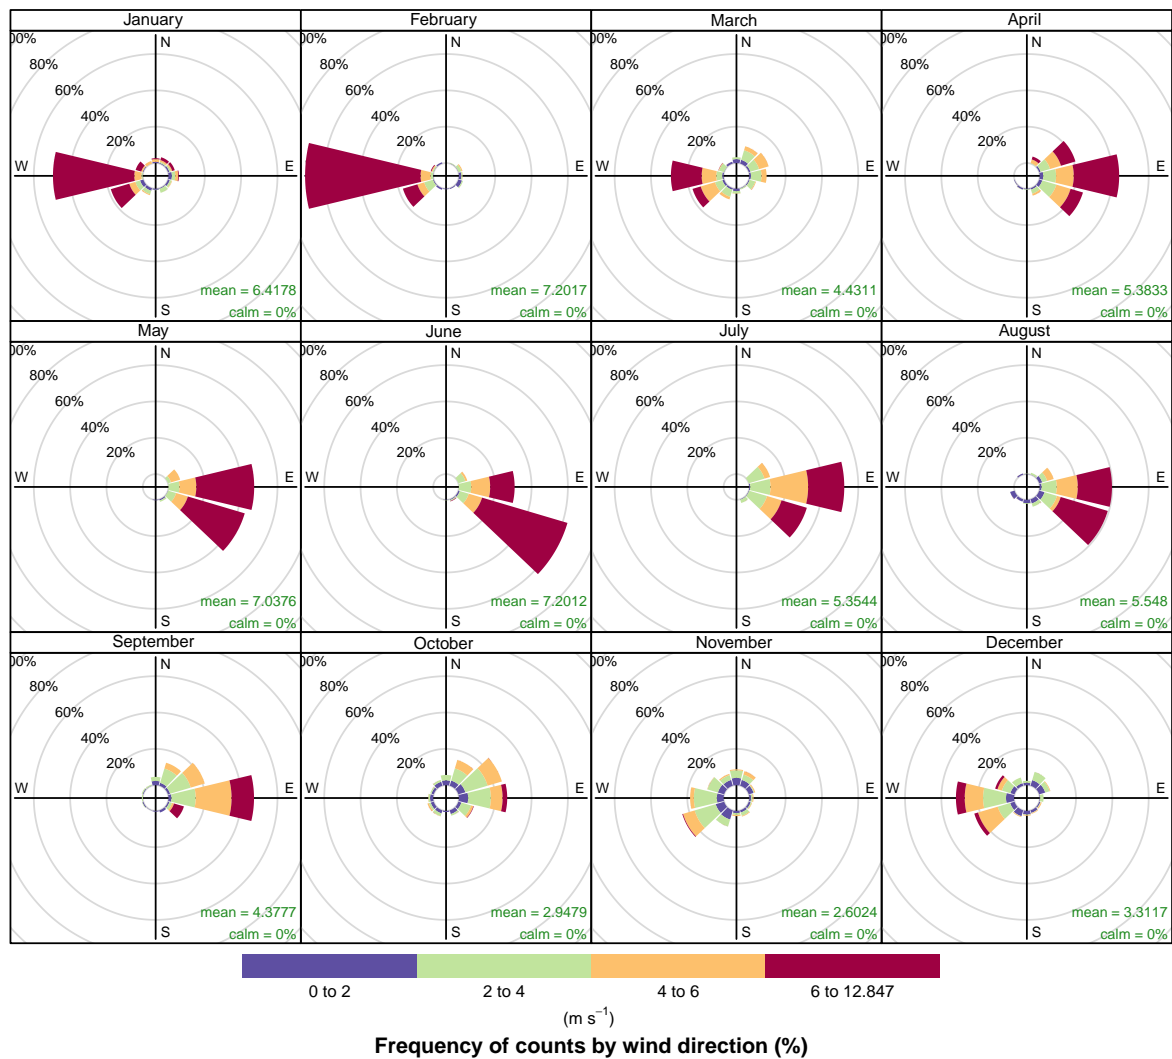

**Figure S9.** Wind rose TCCON Darwin Location for 2019.



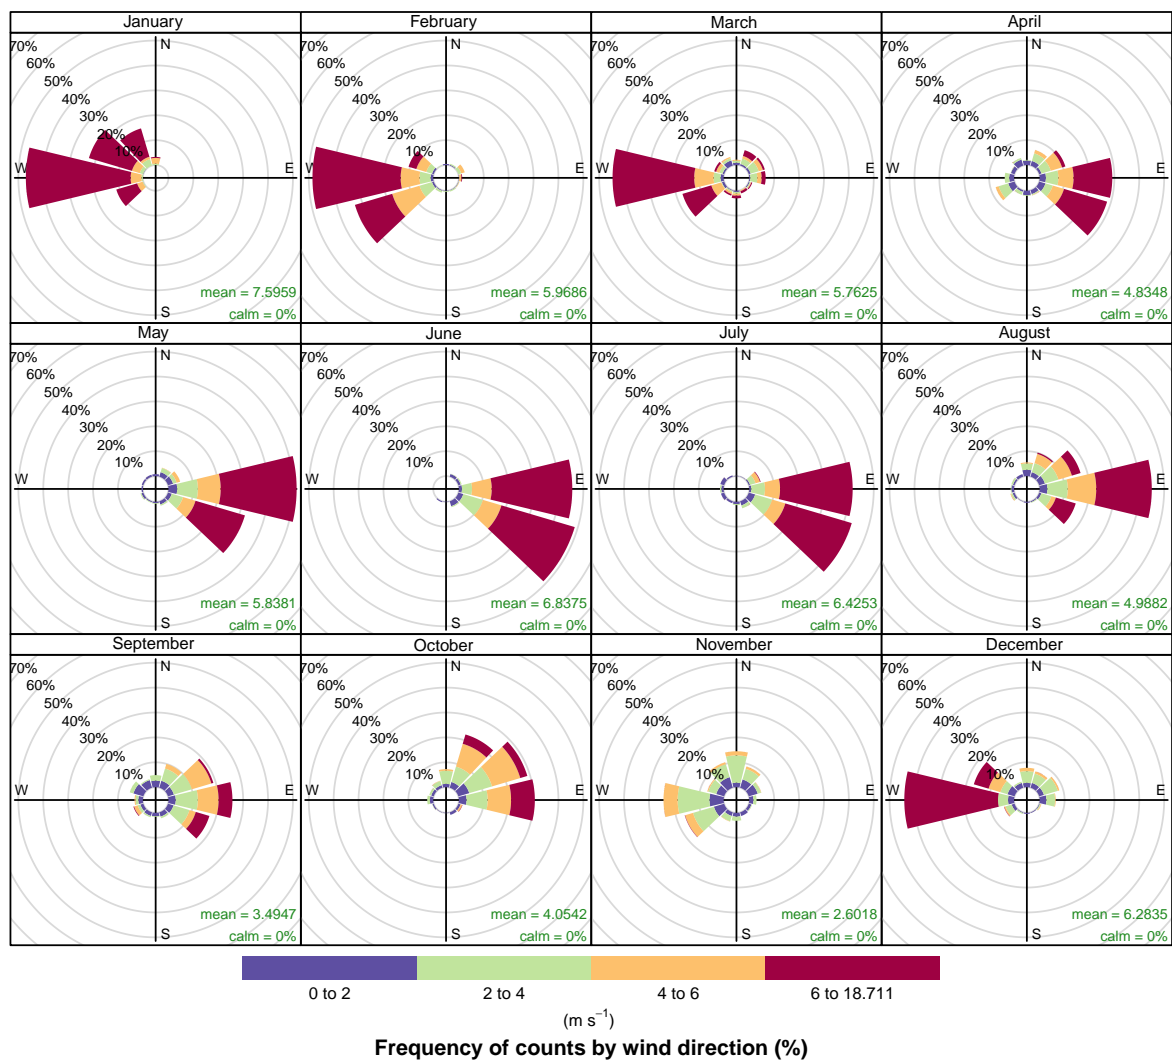

**Figure S10.** Wind rose TCCON Lauder location for 2015.

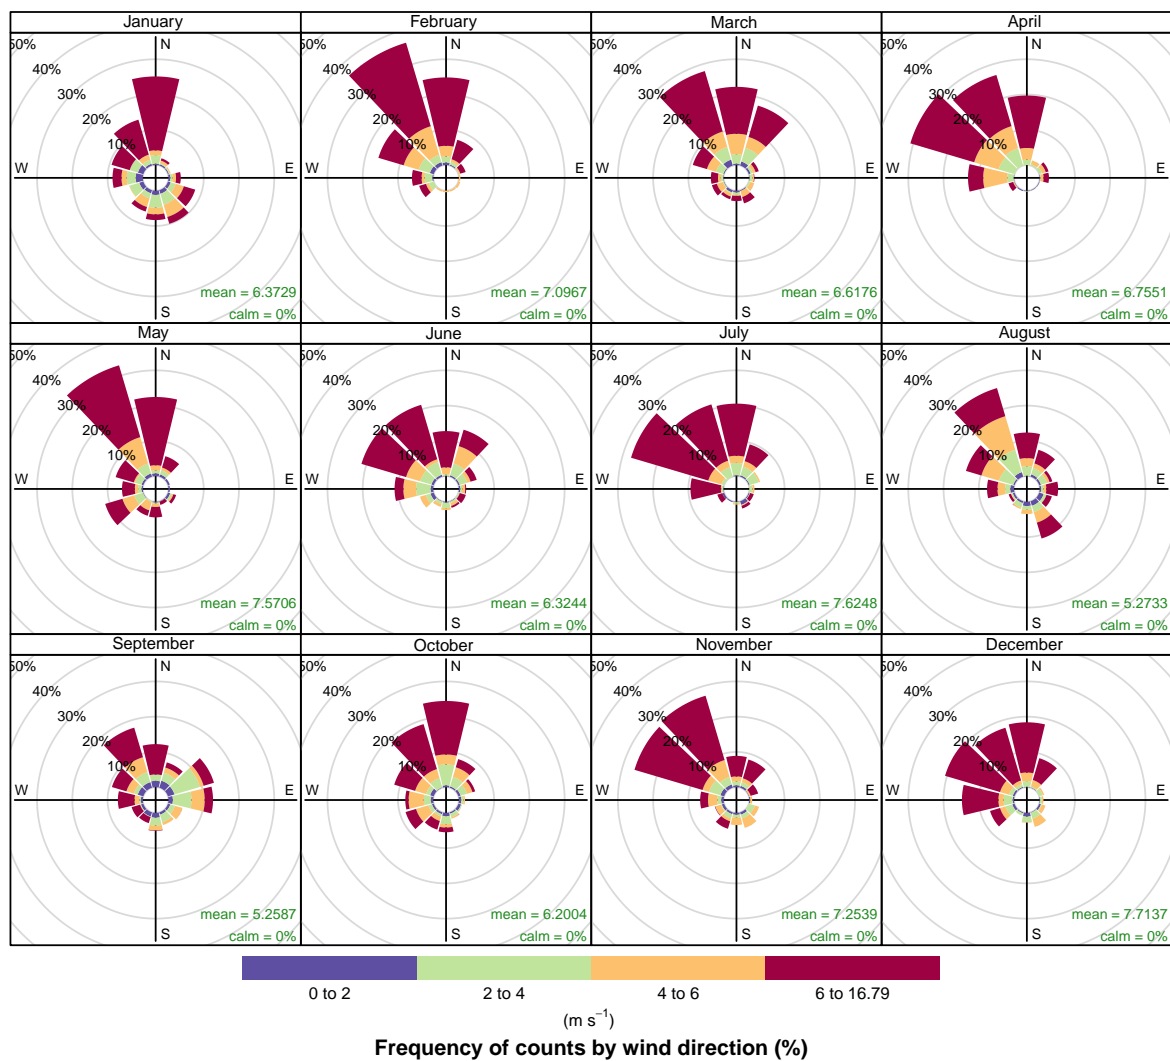

**Figure S11.** Wind rose TCCON Lauder location for 2016.

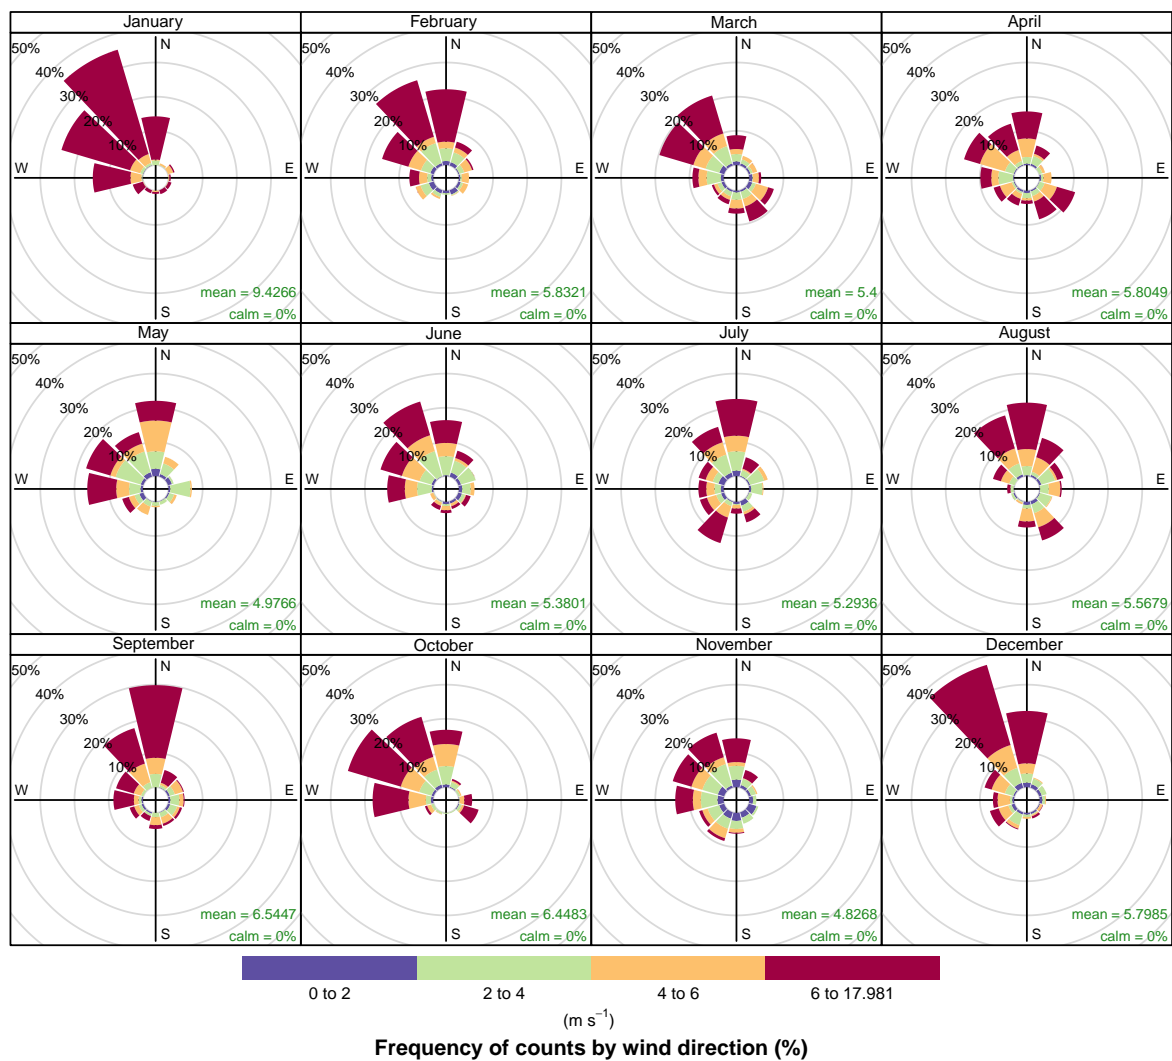

**Figure S12.** Wind rose TCCON Lauder Location for 2017.

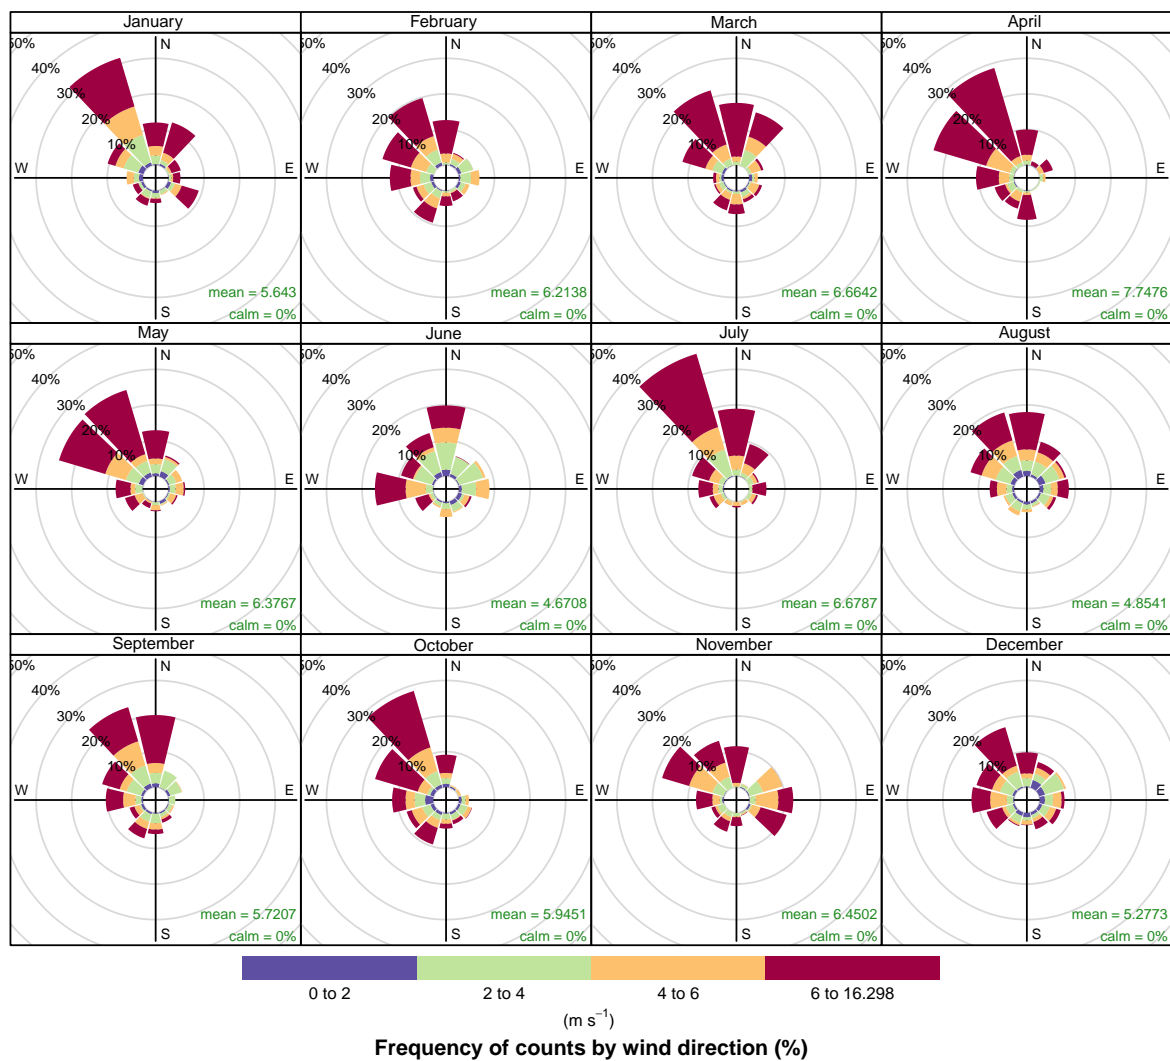

**Figure S13.** Wind rose TCCON Lauder Location for 2018.

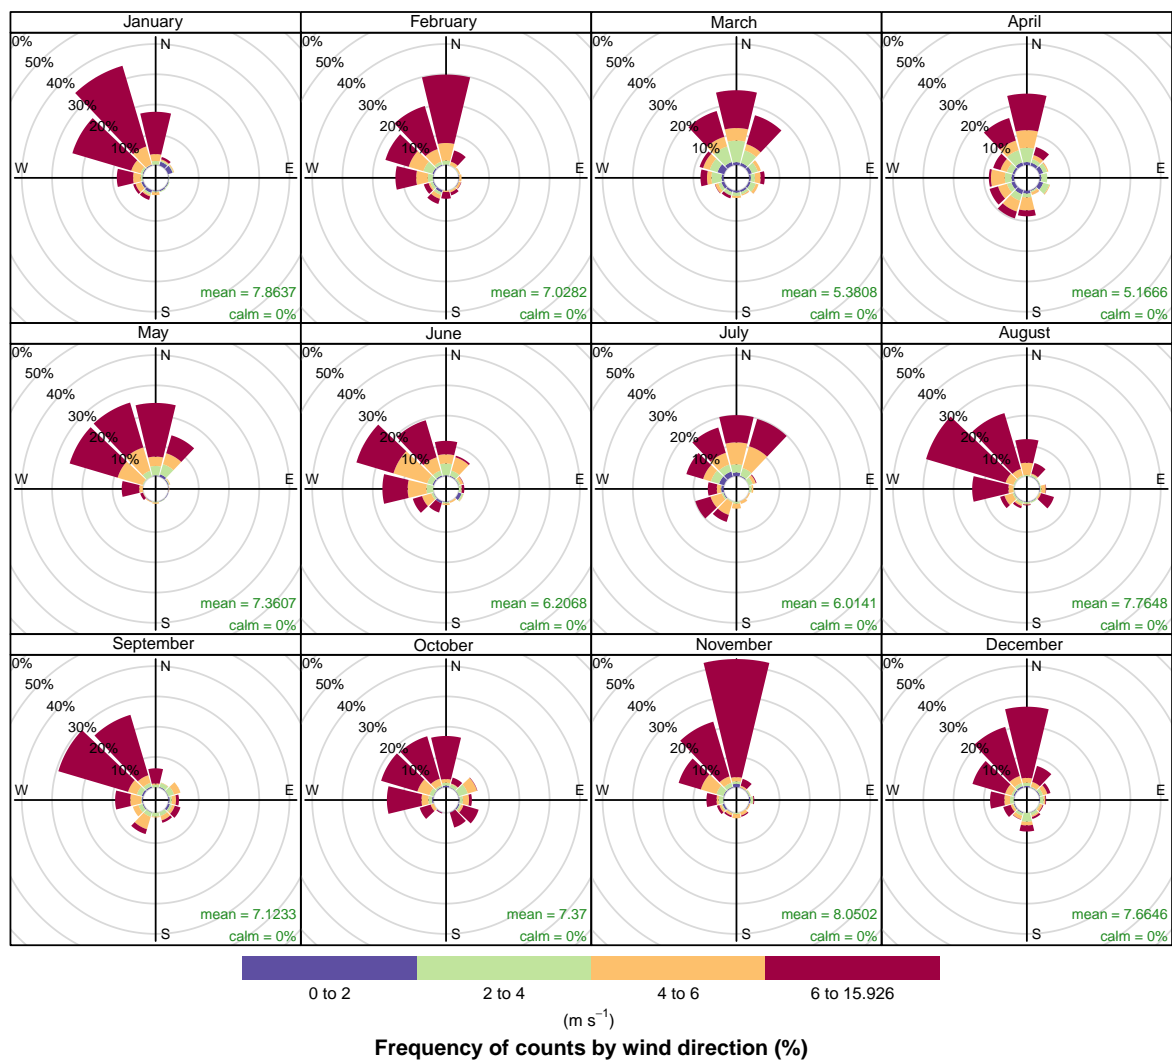

**Figure S14.** Wind rose TCCON Lauder Location for 2019.

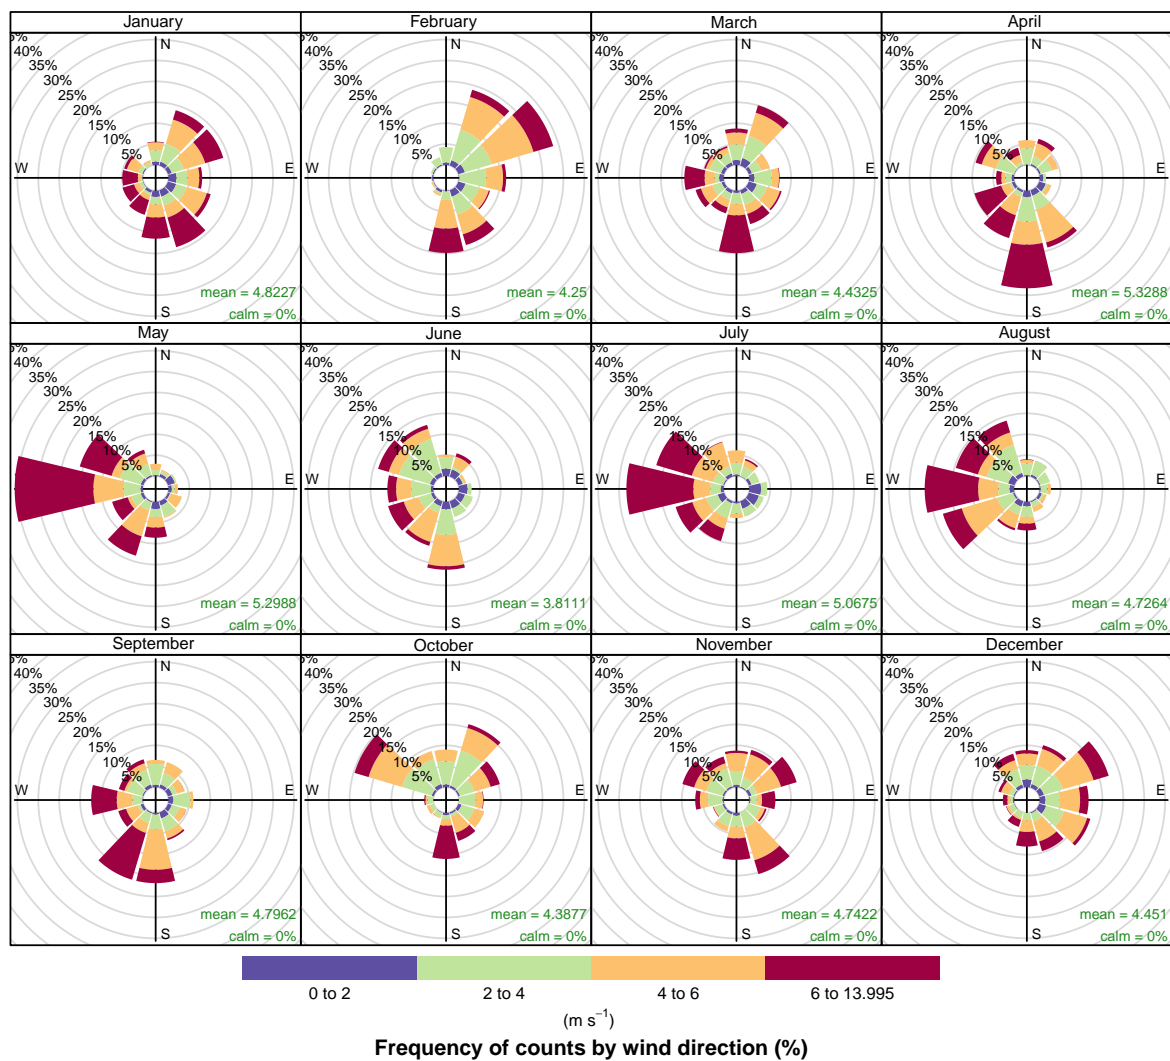

**Figure S15.** Wind rose TCCON Wollongong location for 2015.

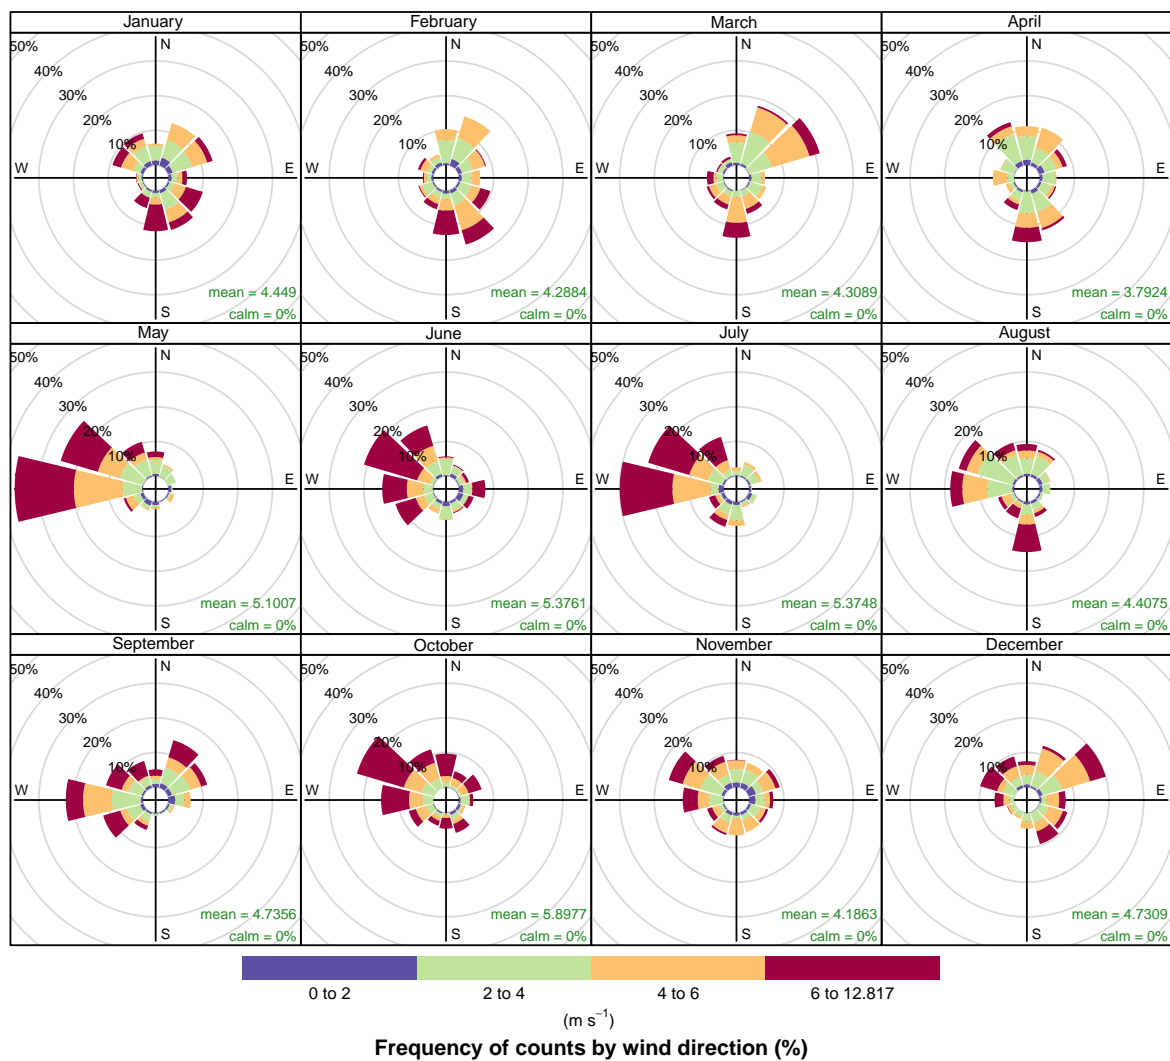

**Figure S16.** Wind rose TCCON Wollongong location for 2016.

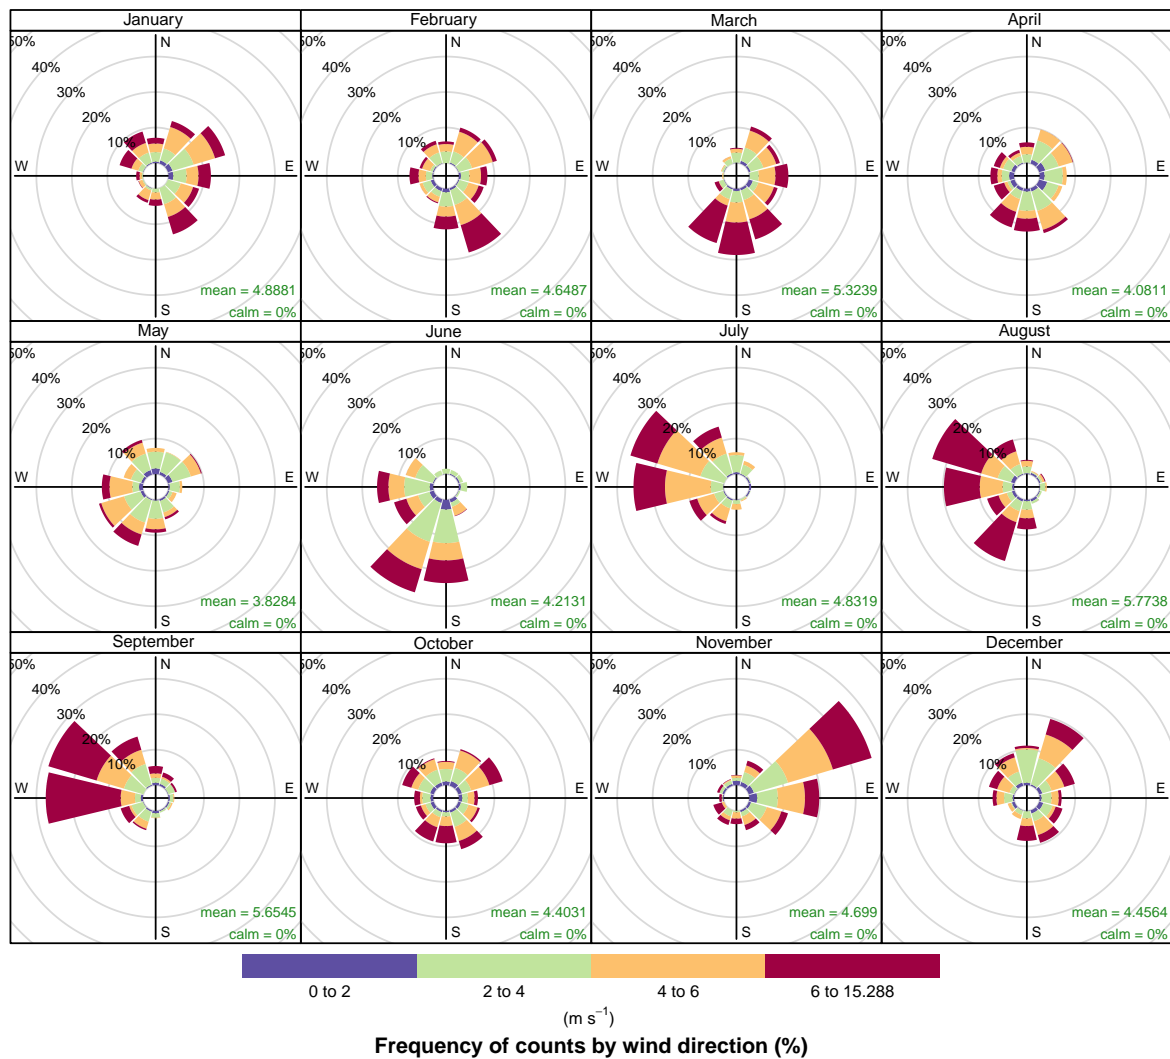

**Figure S17.** Wind rose TCCON Wollongong Location for 2017.



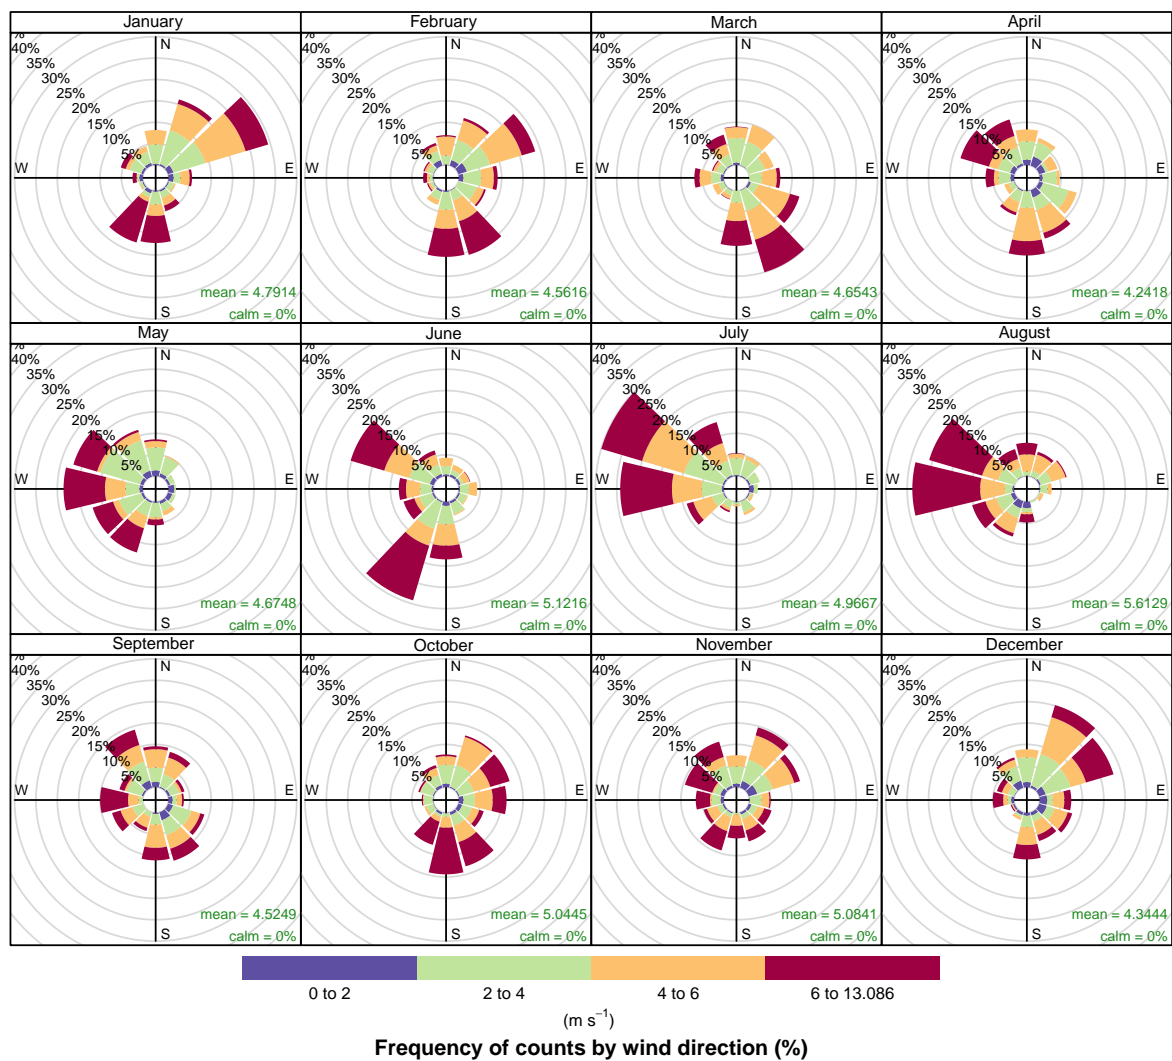

**Figure S18.** Wind rose TCCON Wollongong Location for 2018.

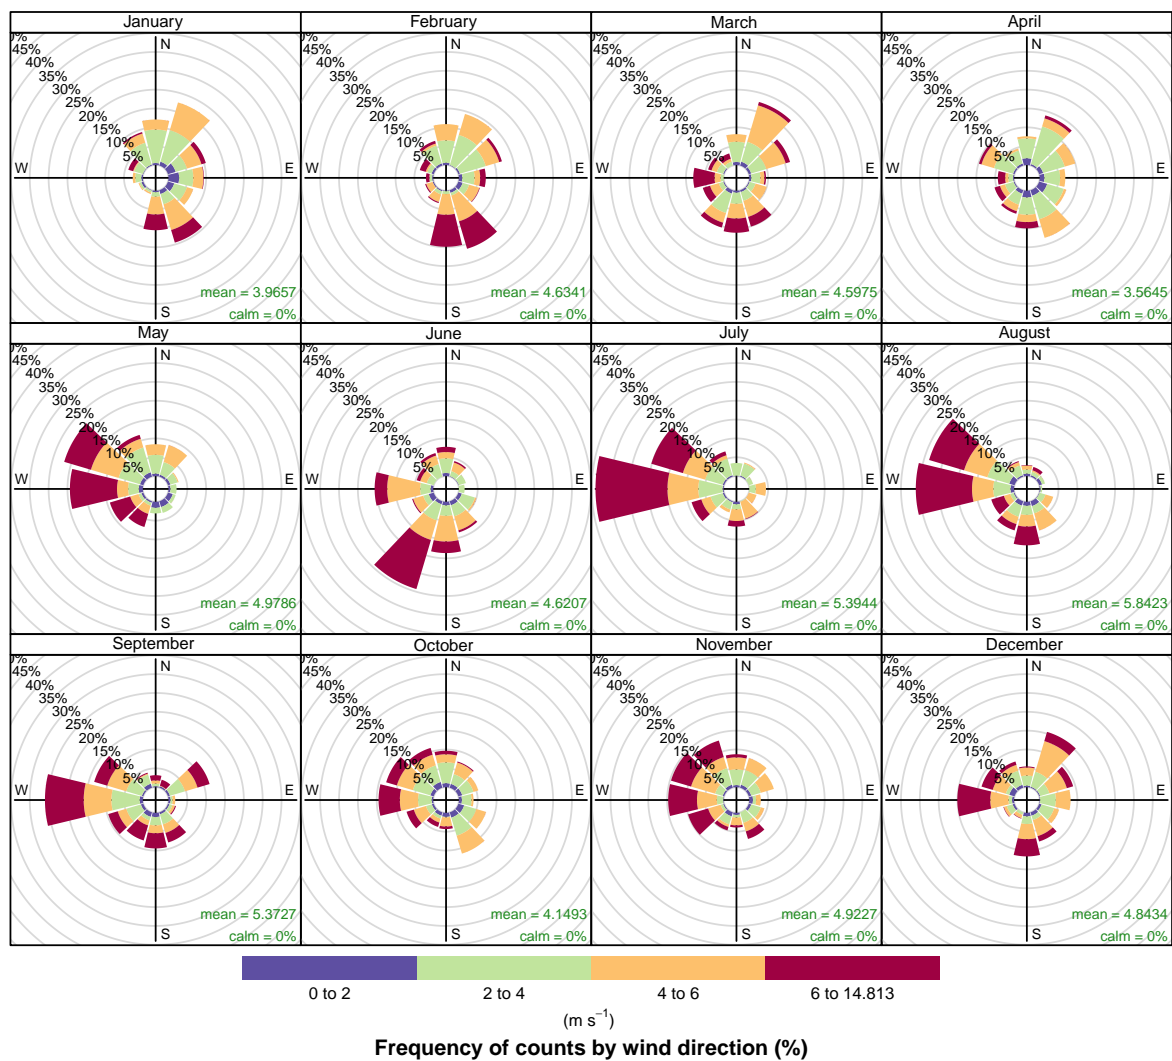

**Figure S19.** Wind rose TCCON Wollongong Location for 2019.

2.2 Wind directions at in-situ sites

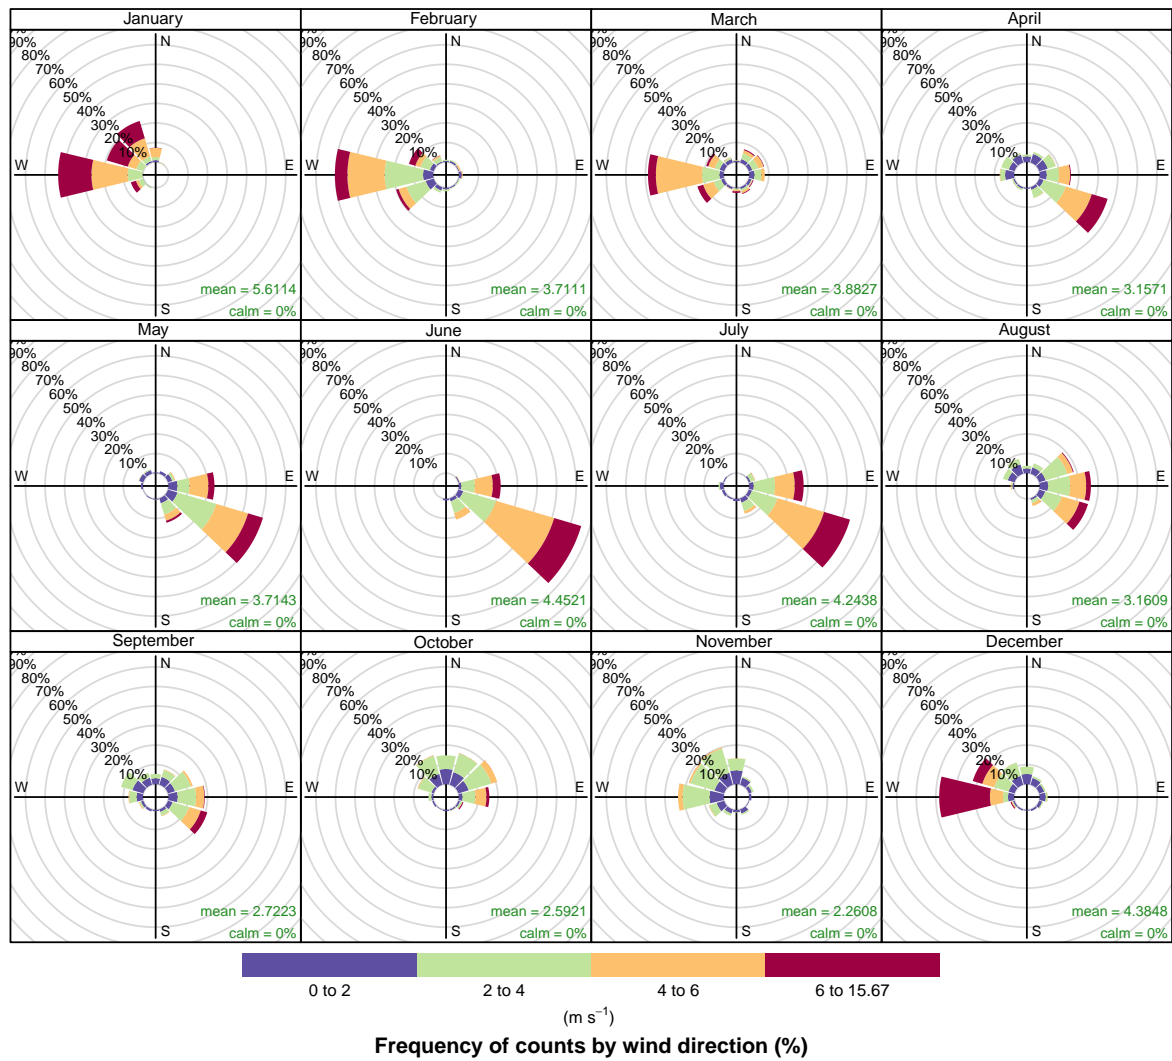

Figure S20. Wind rose Gunn Point location for 2015.

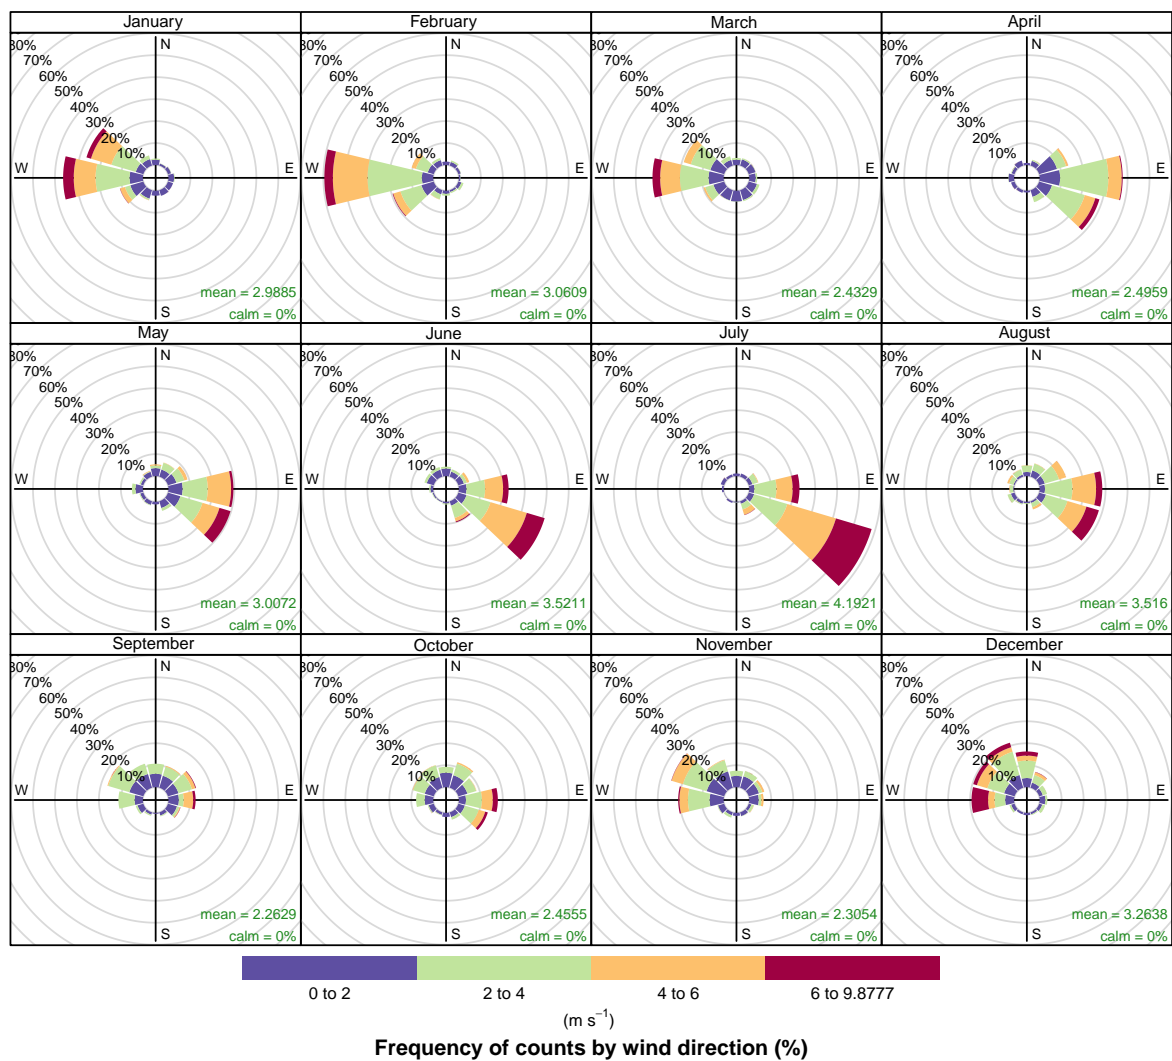

**Figure S21.** Wind rose Gunn Point location for 2016.

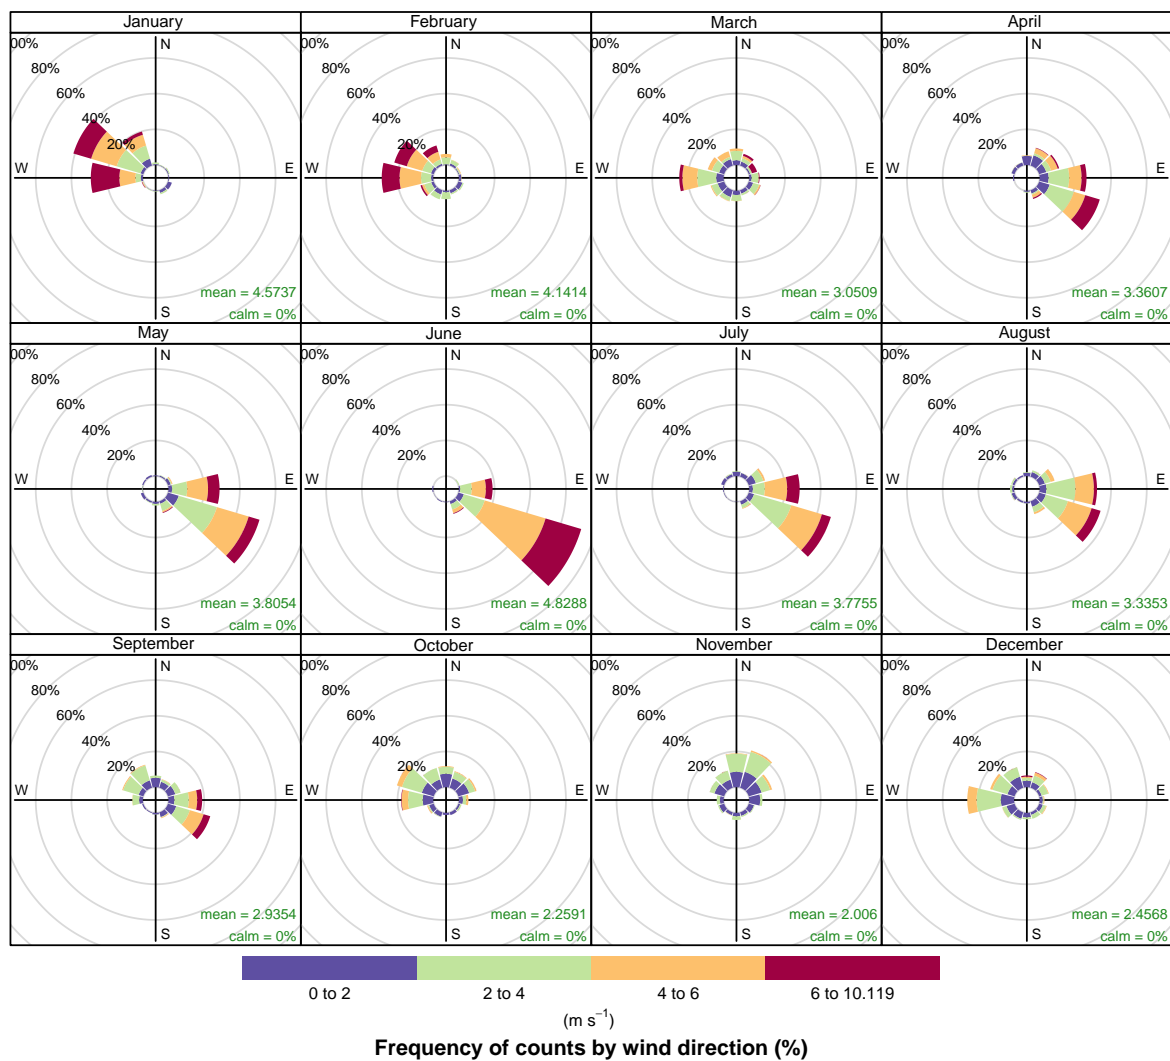

**Figure S22.** Wind rose Gunn Point Location for 2017.

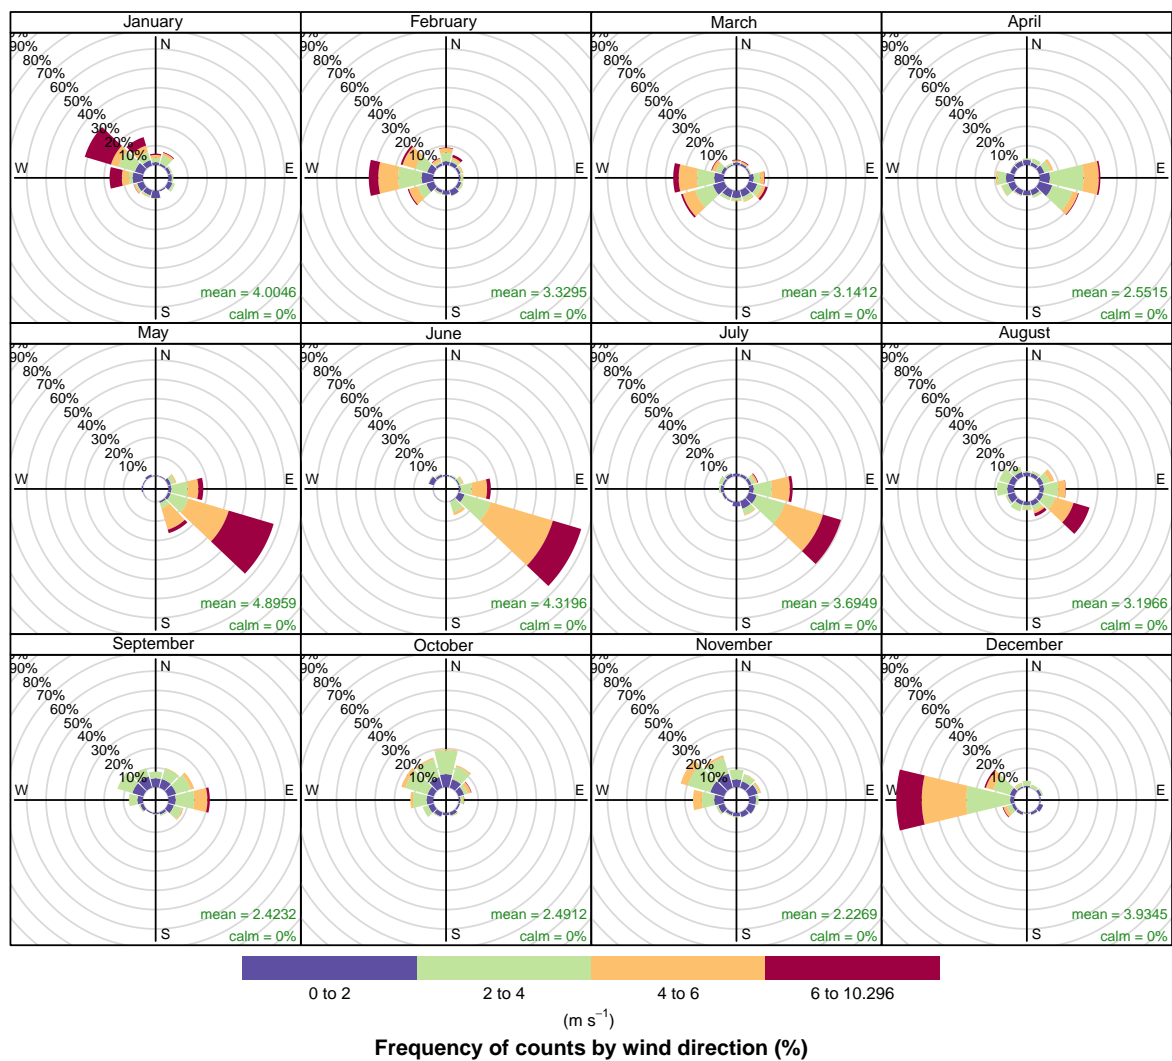

**Figure S23.** Wind rose Gunn Point Location for 2018.

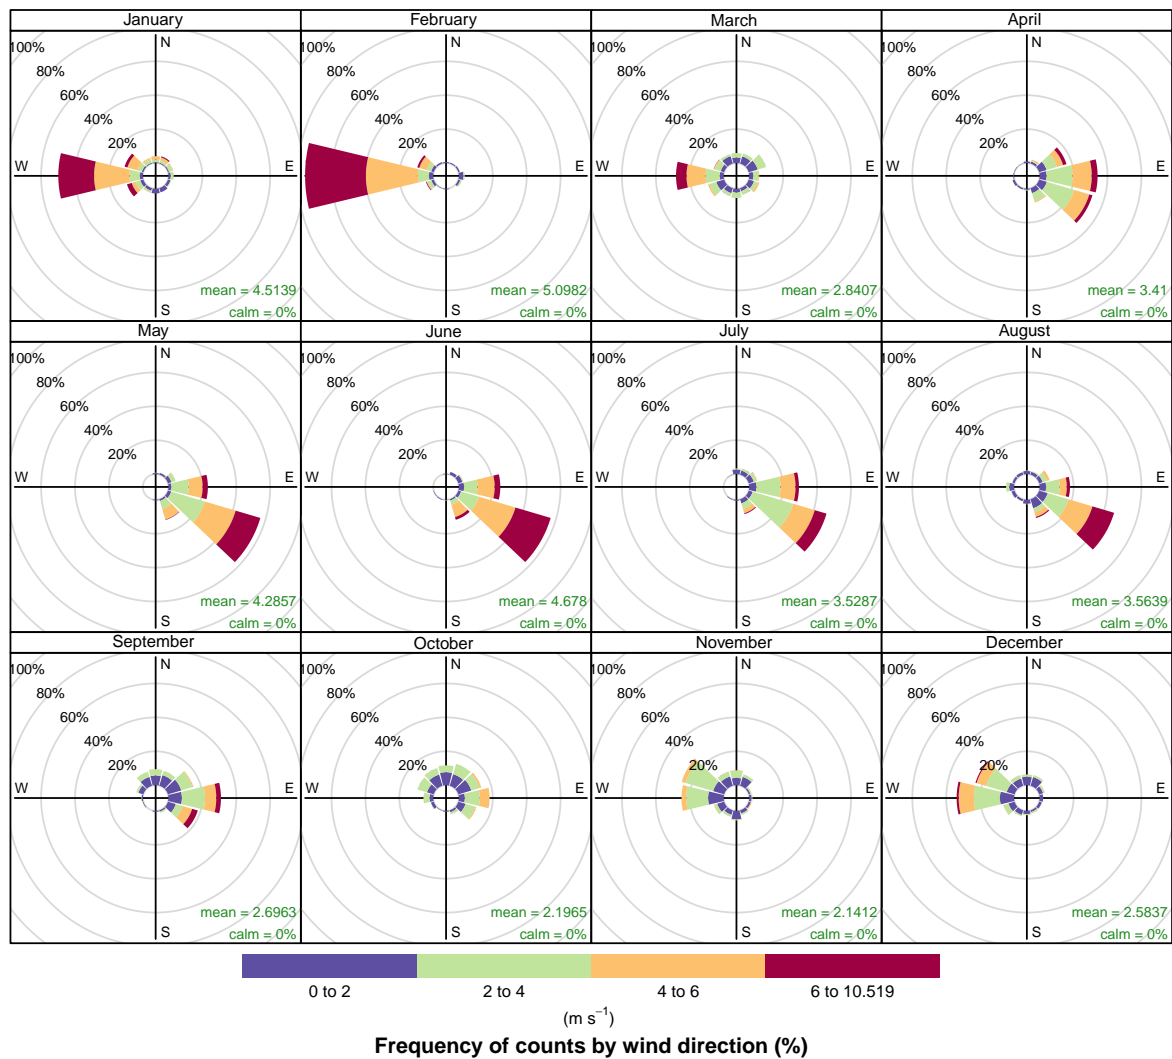

**Figure S24.** Wind rose Gunn Point Location for 2019.

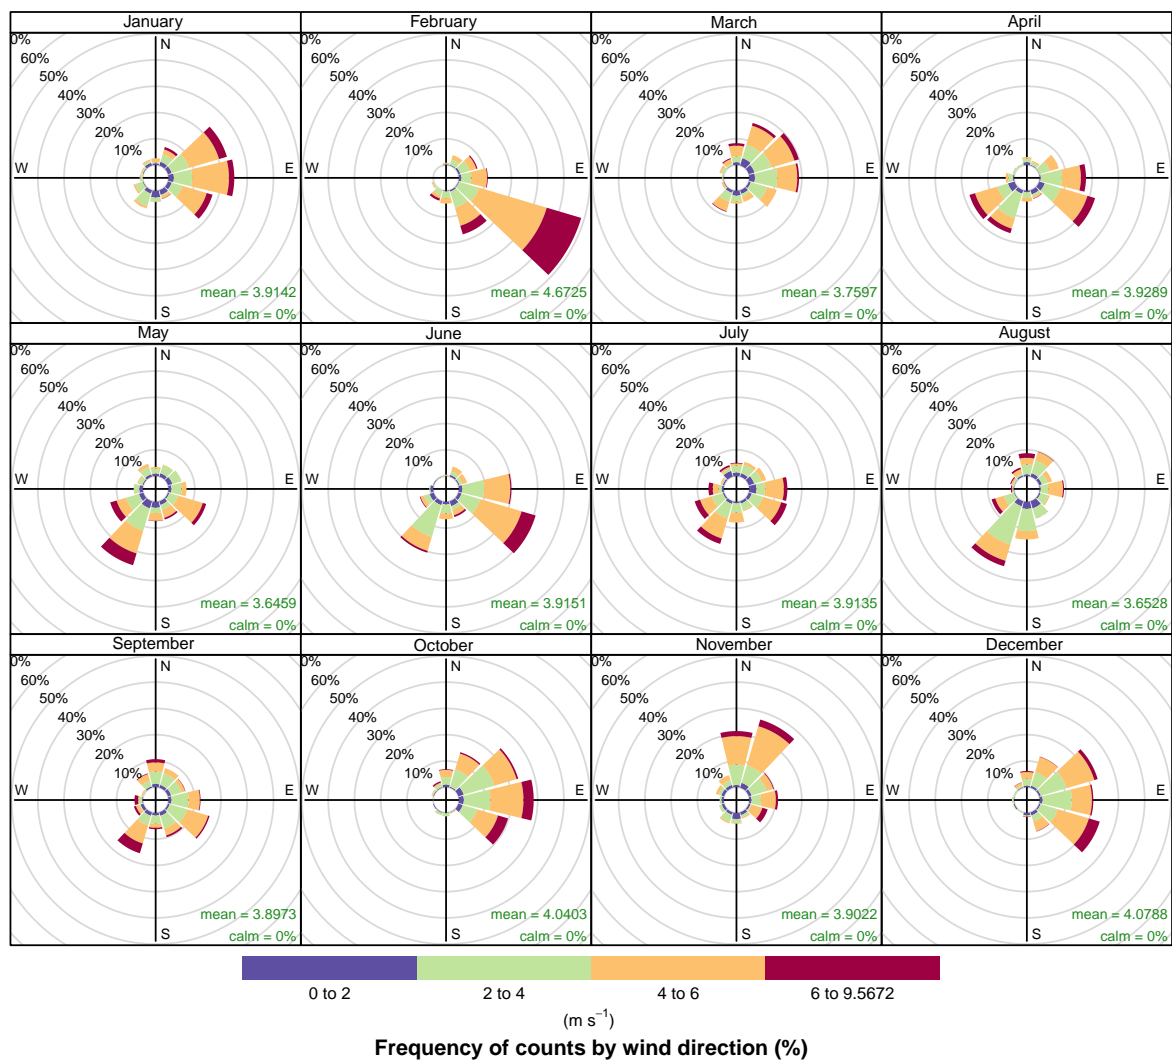

**Figure S25.** Wind rose Burncluith location for 2015.



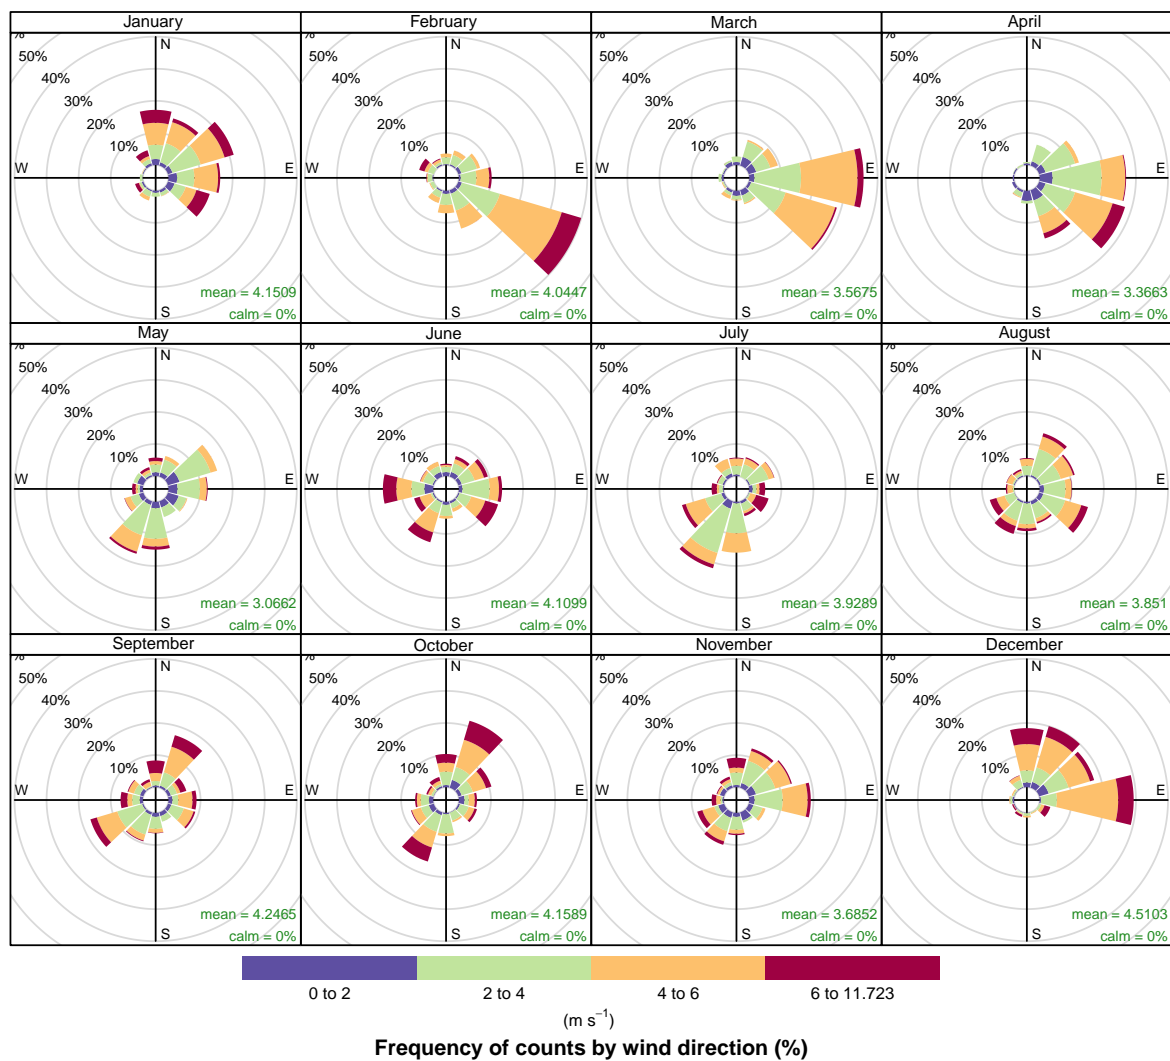

**Figure S26.** Wind rose Burncluith location for 2016.

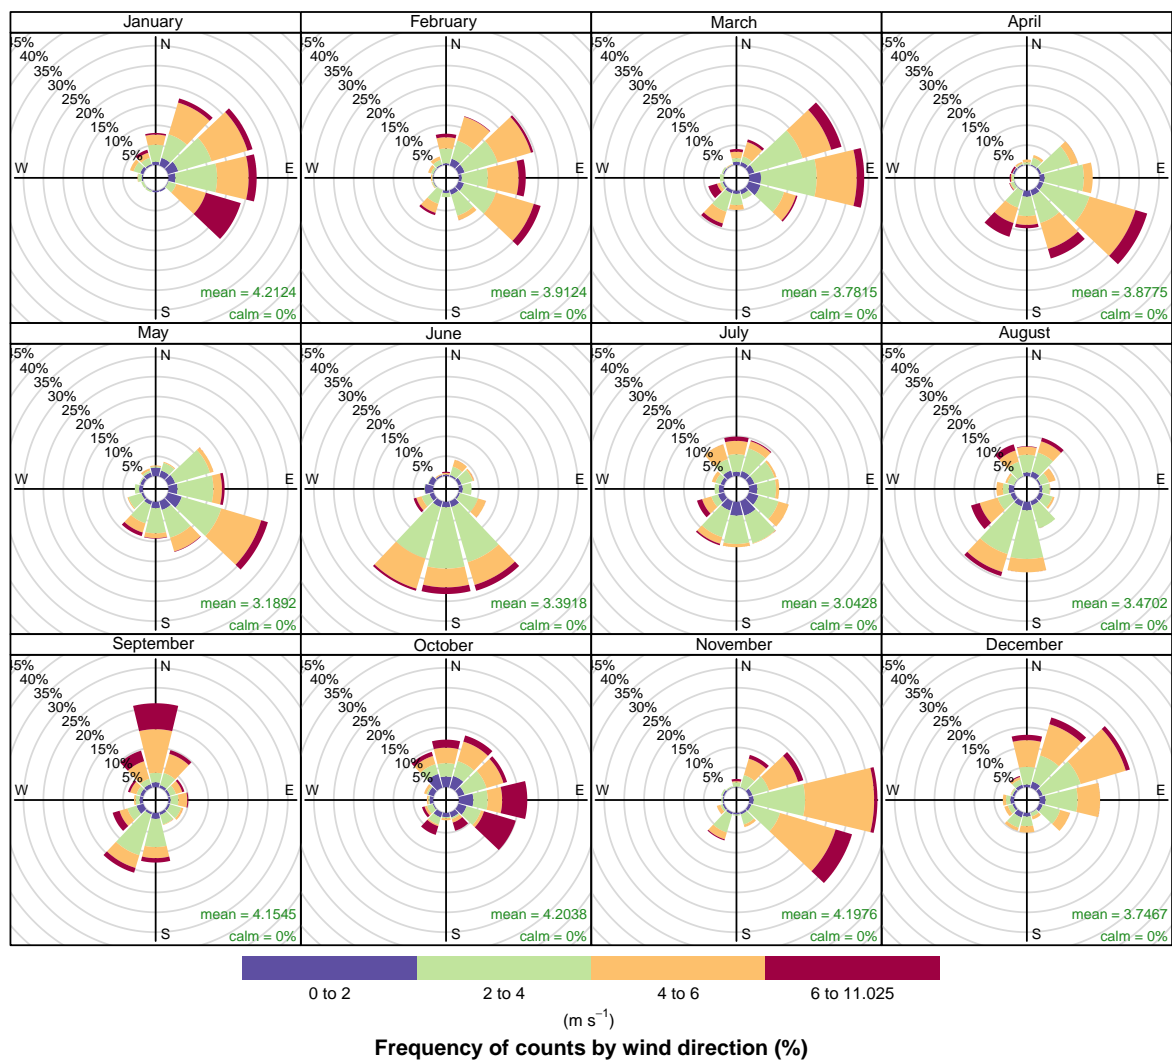

**Figure S27.** Wind rose Burncluith location for 2017.

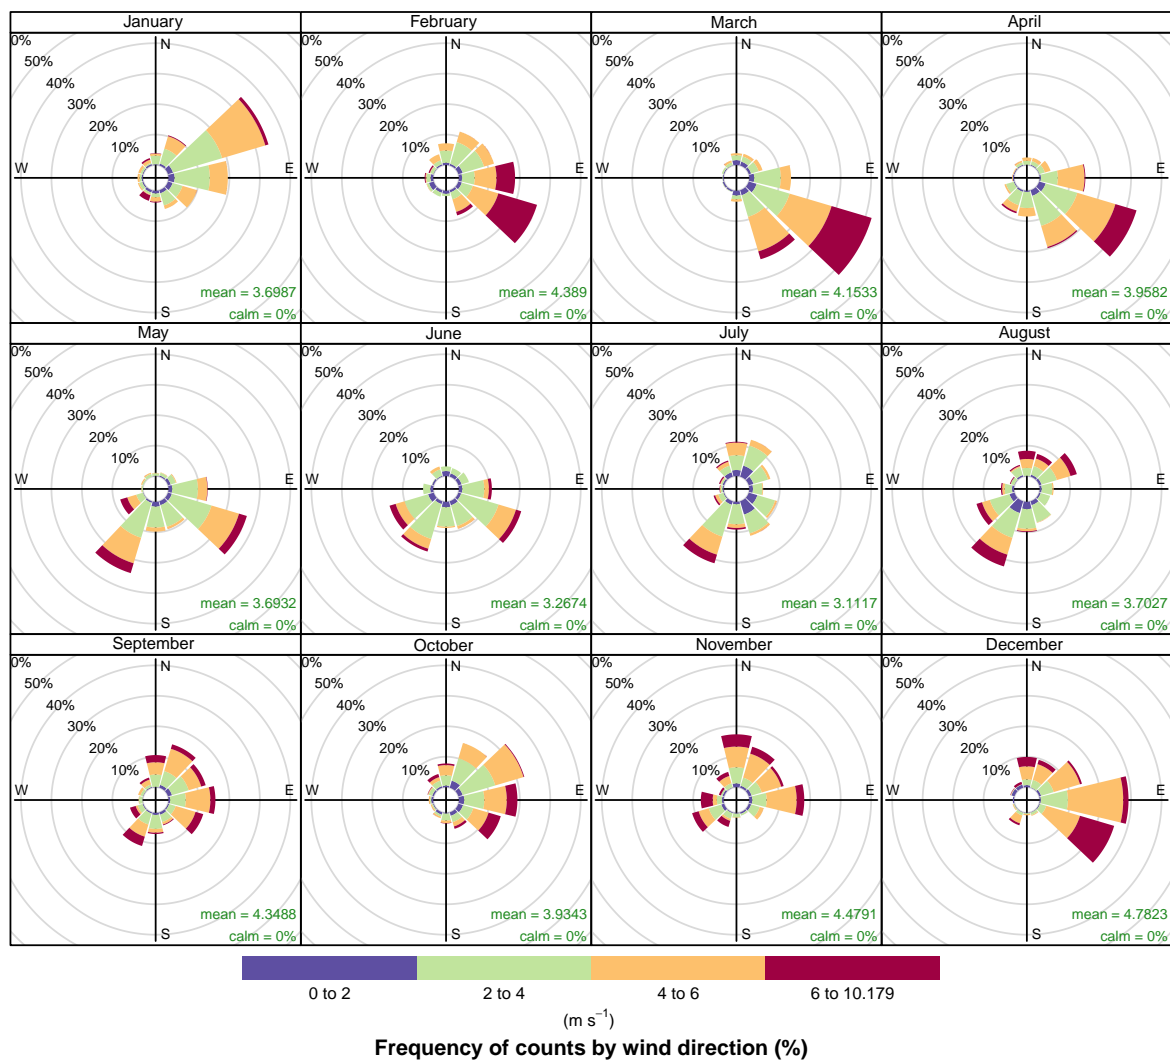

**Figure S28.** Wind rose Burncluith location for 2018.

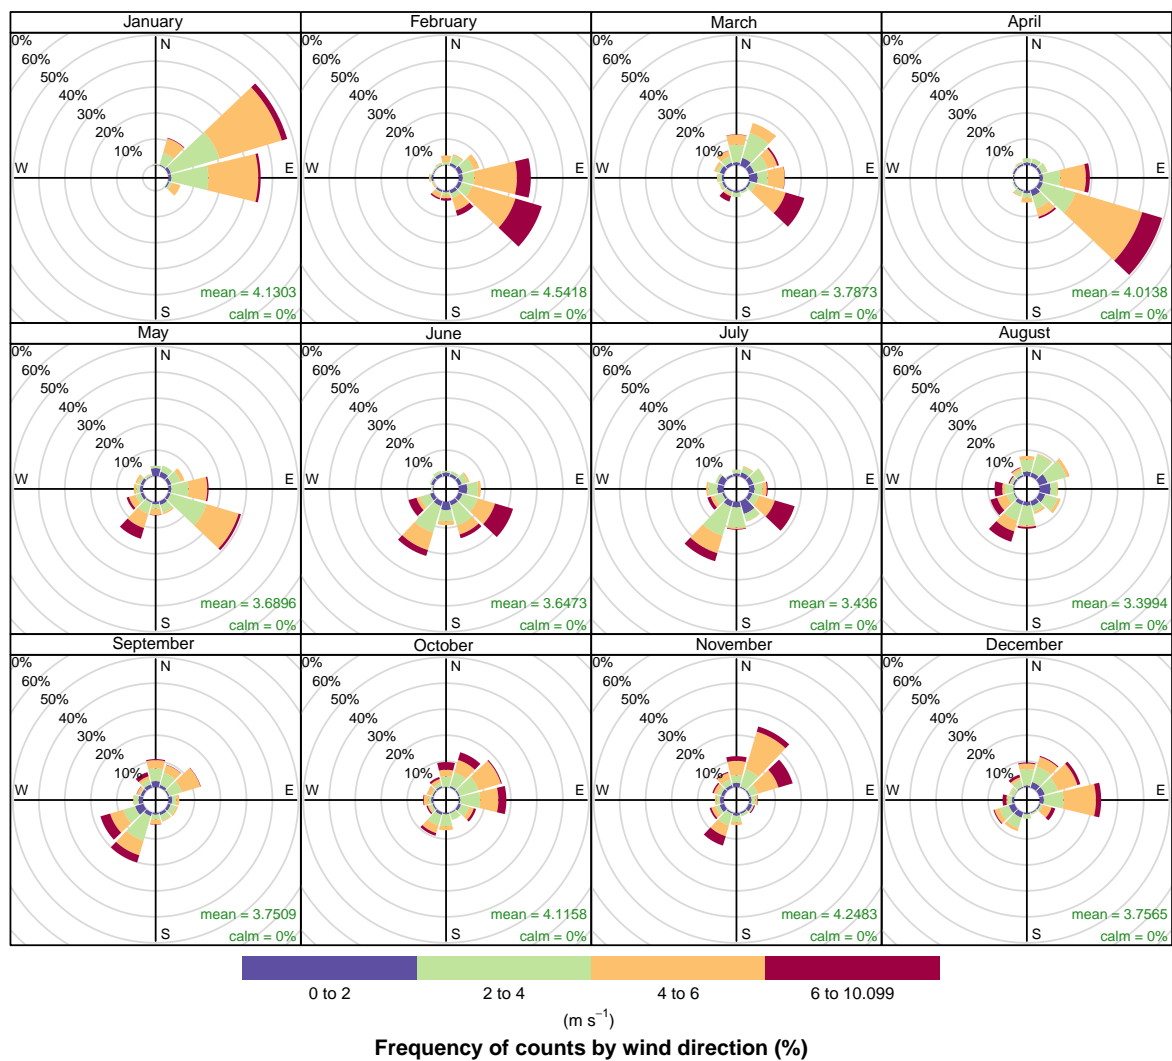

**Figure S29.** Wind rose Ironbark location for 2019.

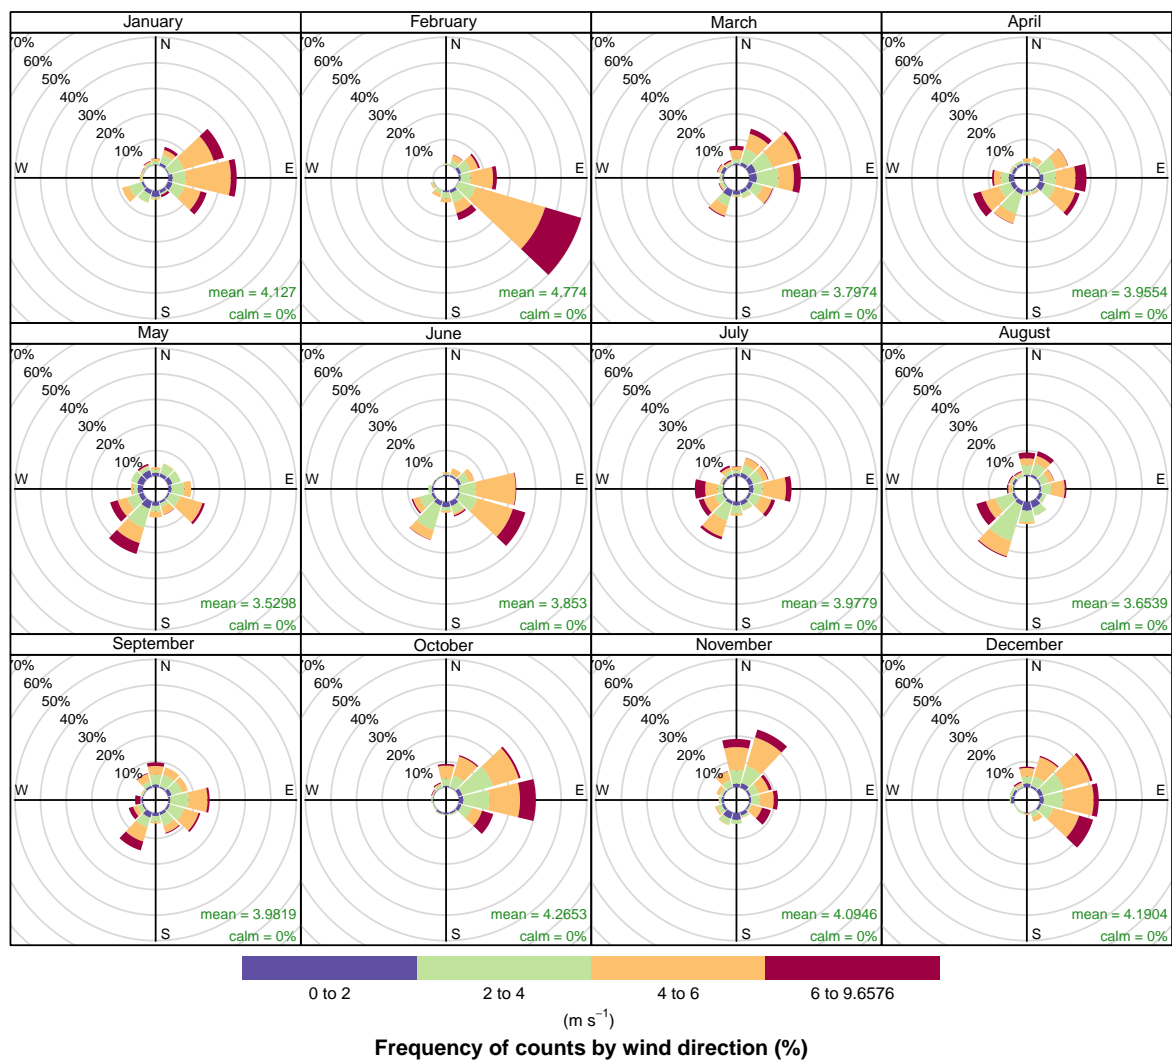

**Figure S30.** Wind rose Ironbark location for 2015.

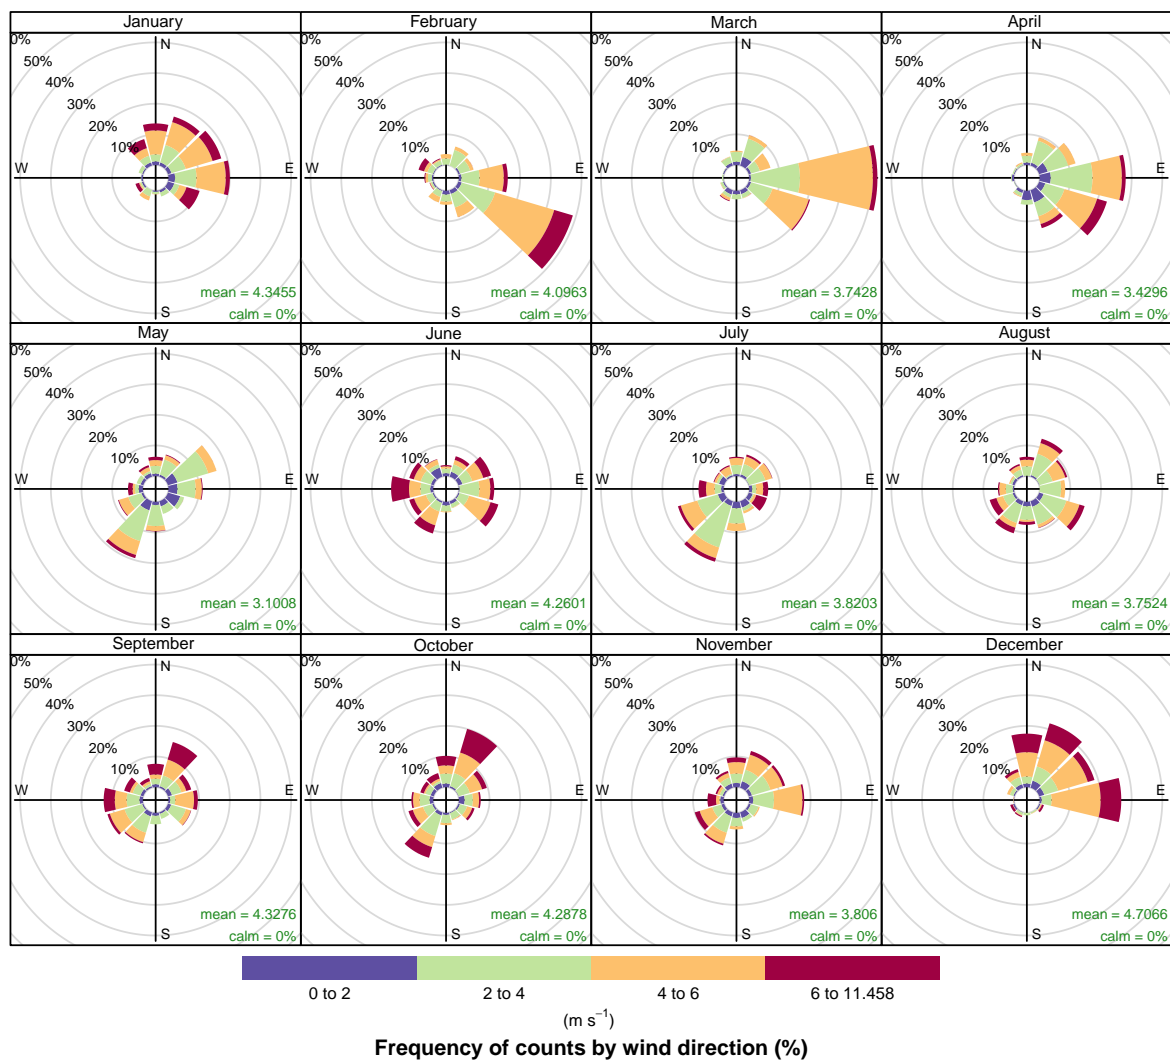

**Figure S31.** Wind rose Ironbark location for 2016.

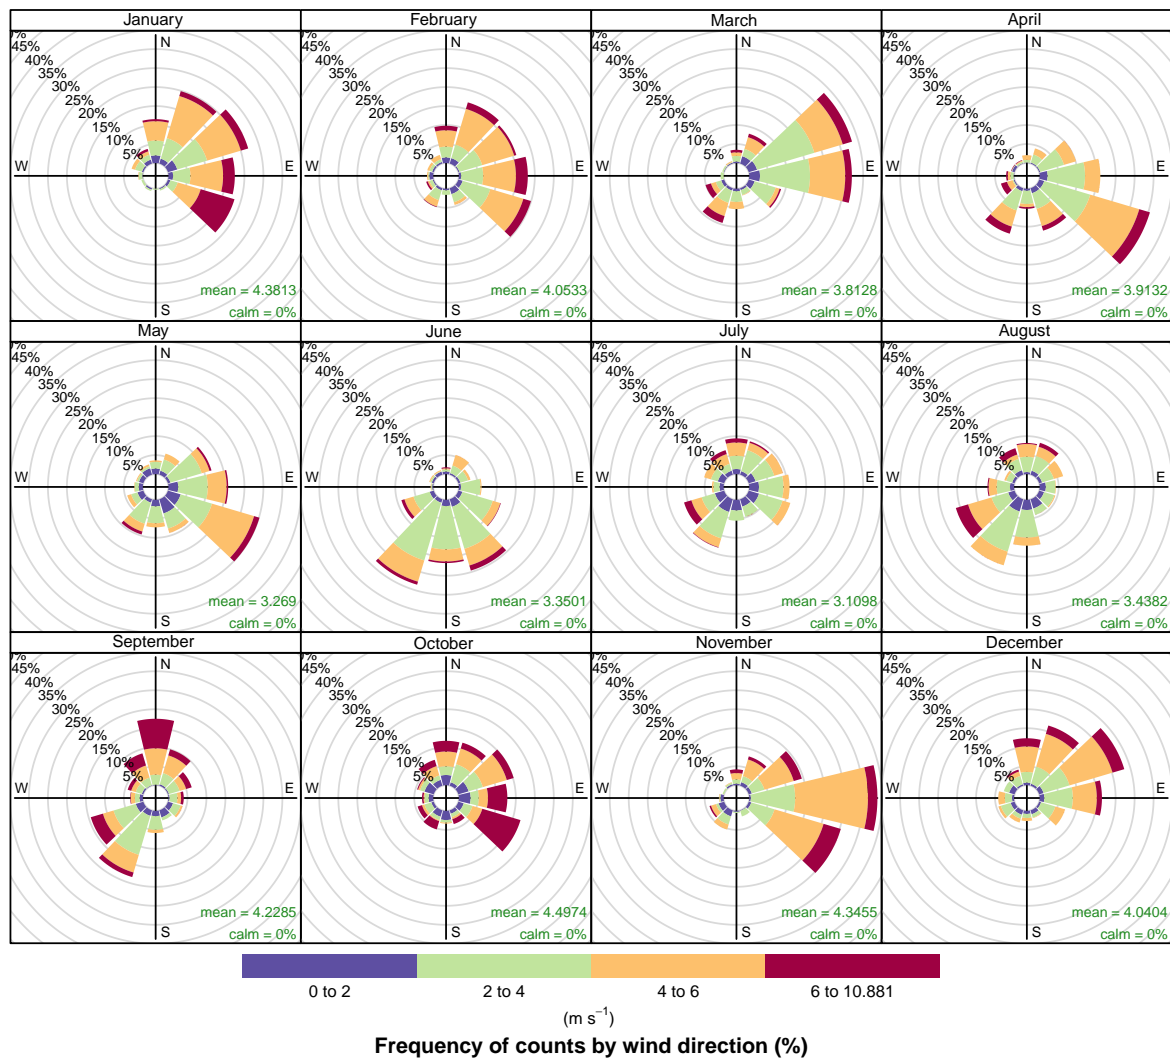

**Figure S32.** Wind rose Ironbark location for 2017.

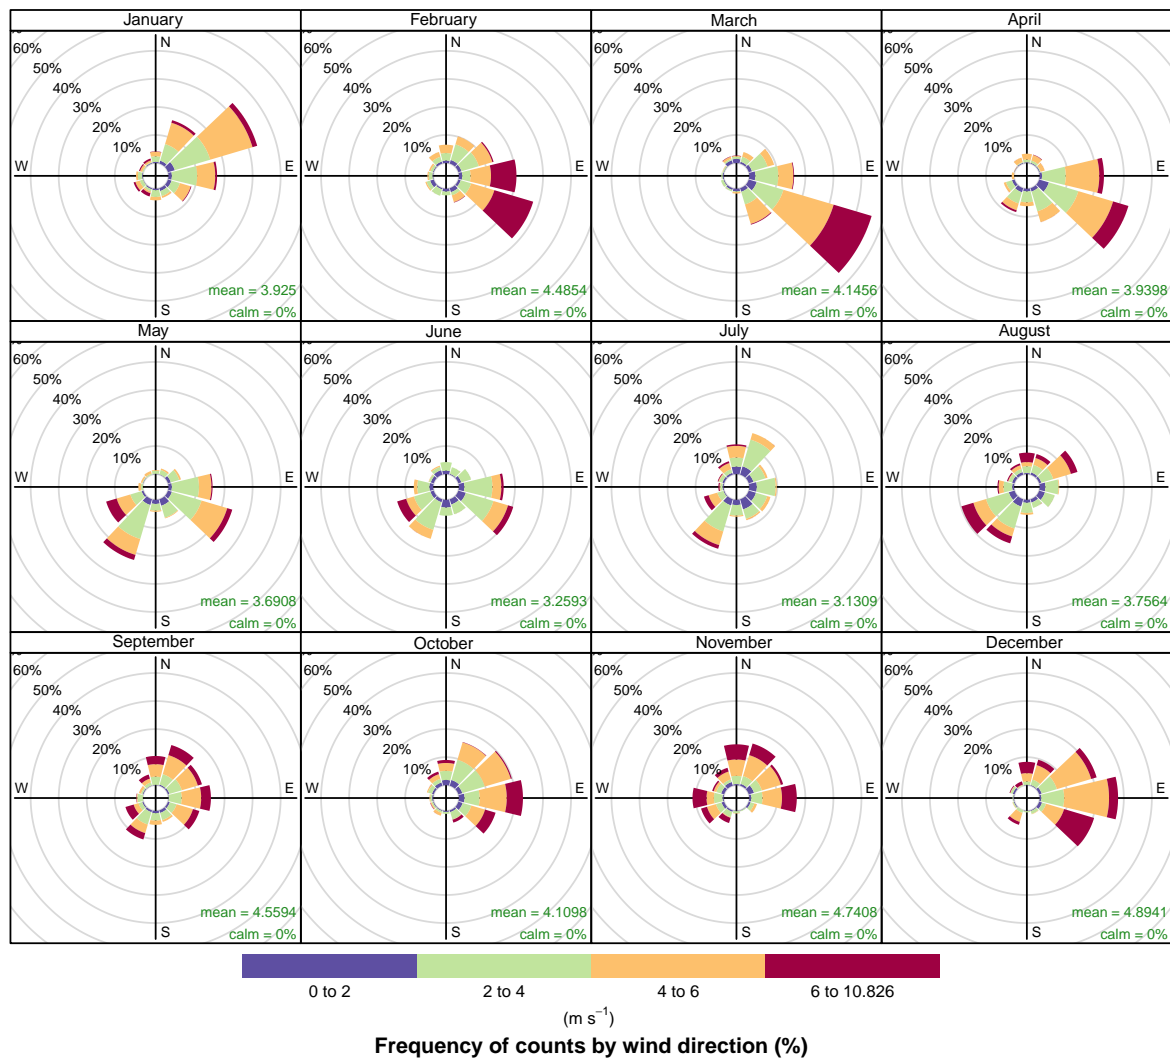

**Figure S33.** Wind rose Ironbark location for 2018.



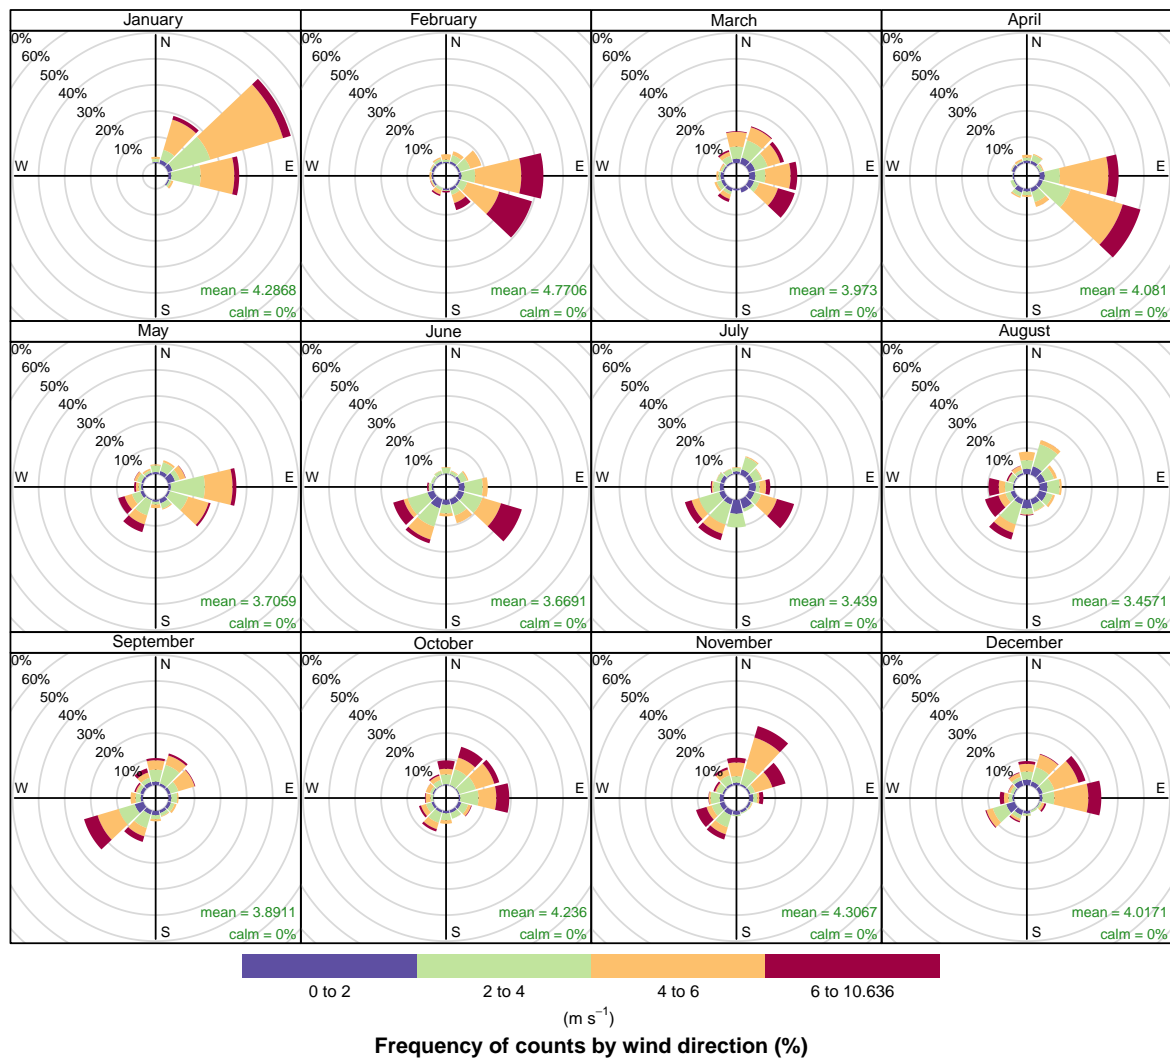

**Figure S34.** Wind rose Ironbark location for 2019.

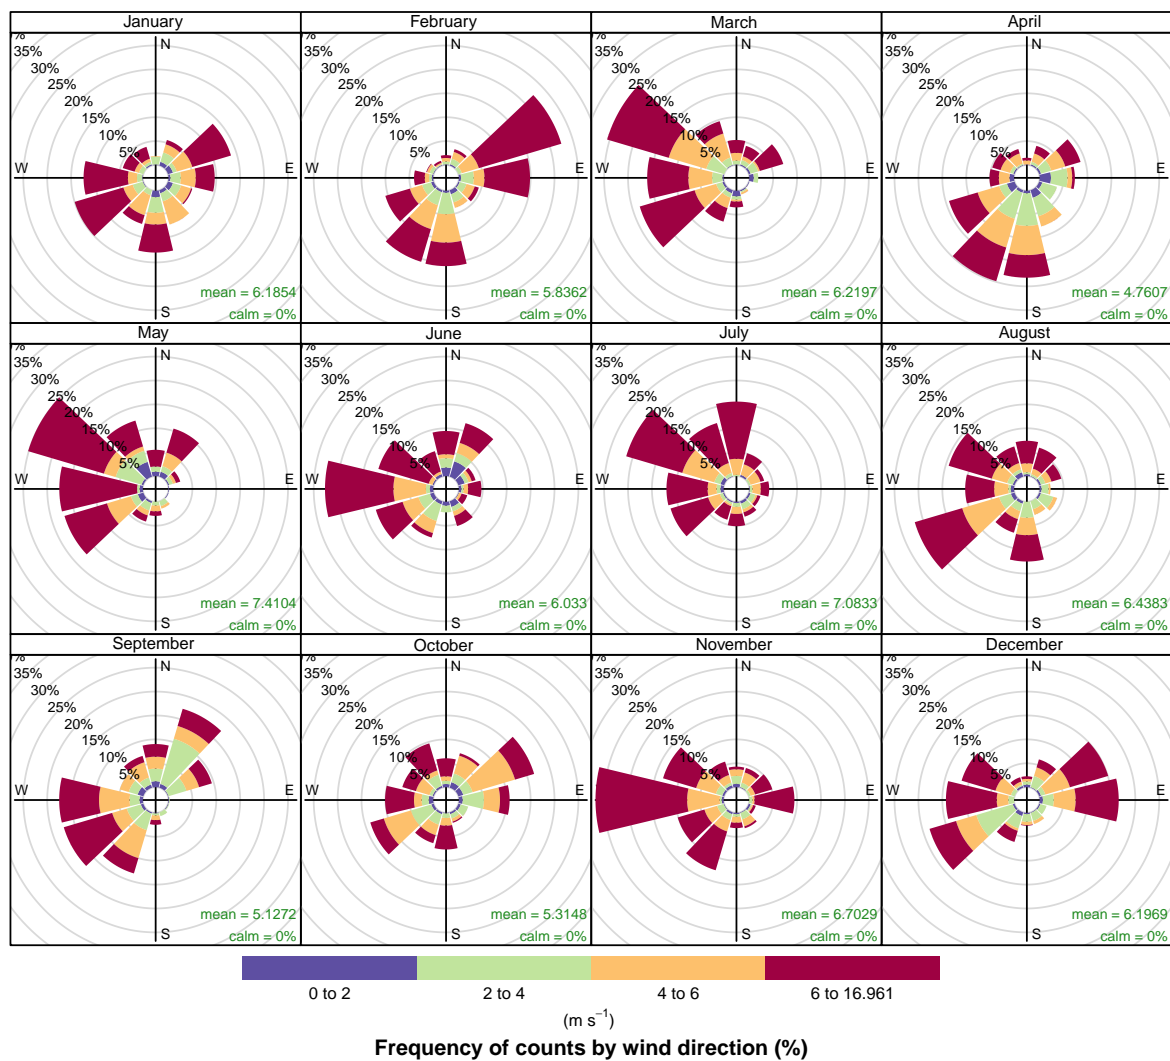

**Figure S35.** Wind rose Cape Grim location for 2015.

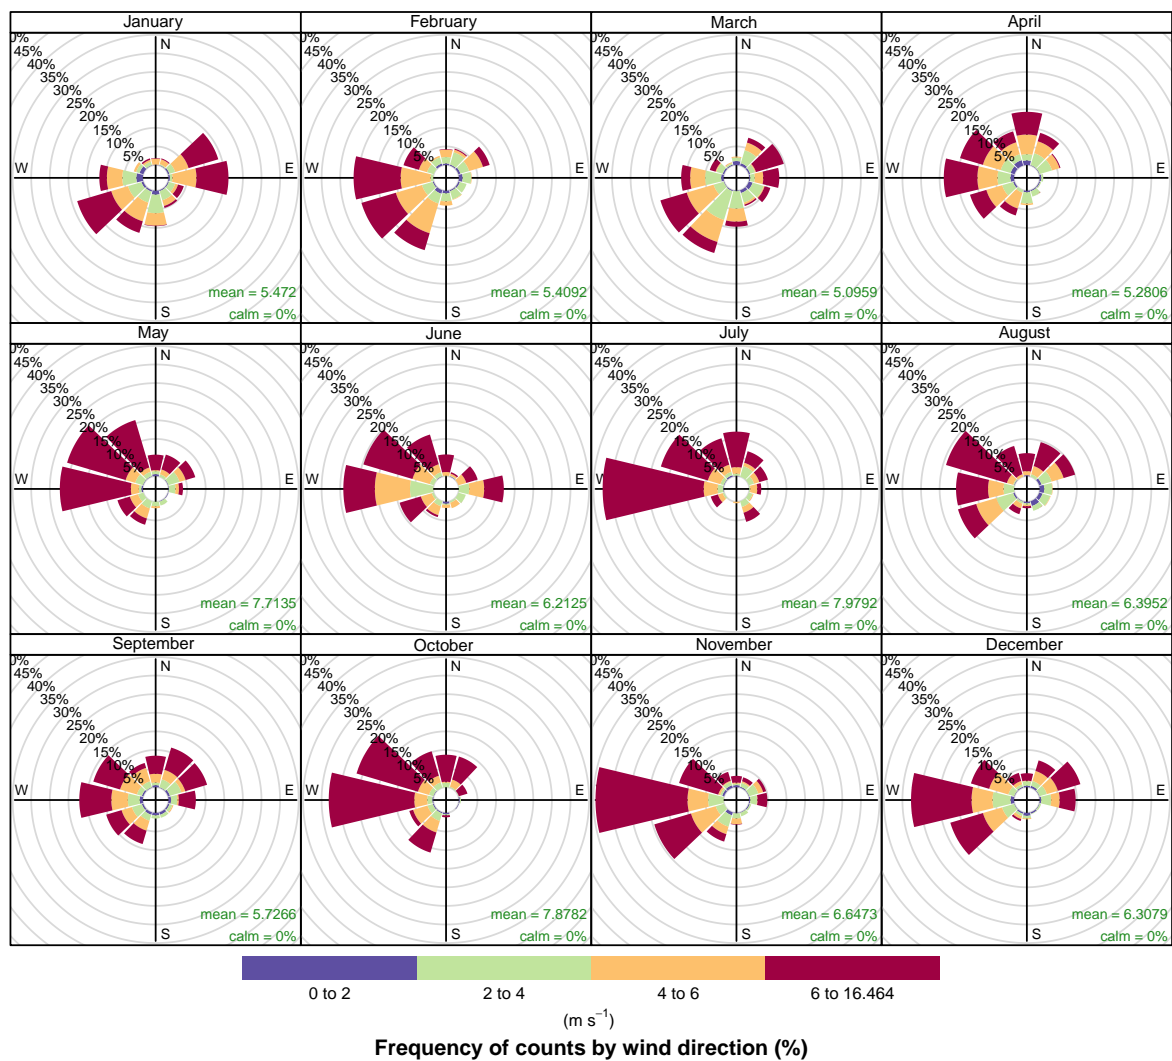

**Figure S36.** Wind rose Cape Grim location for 2016.

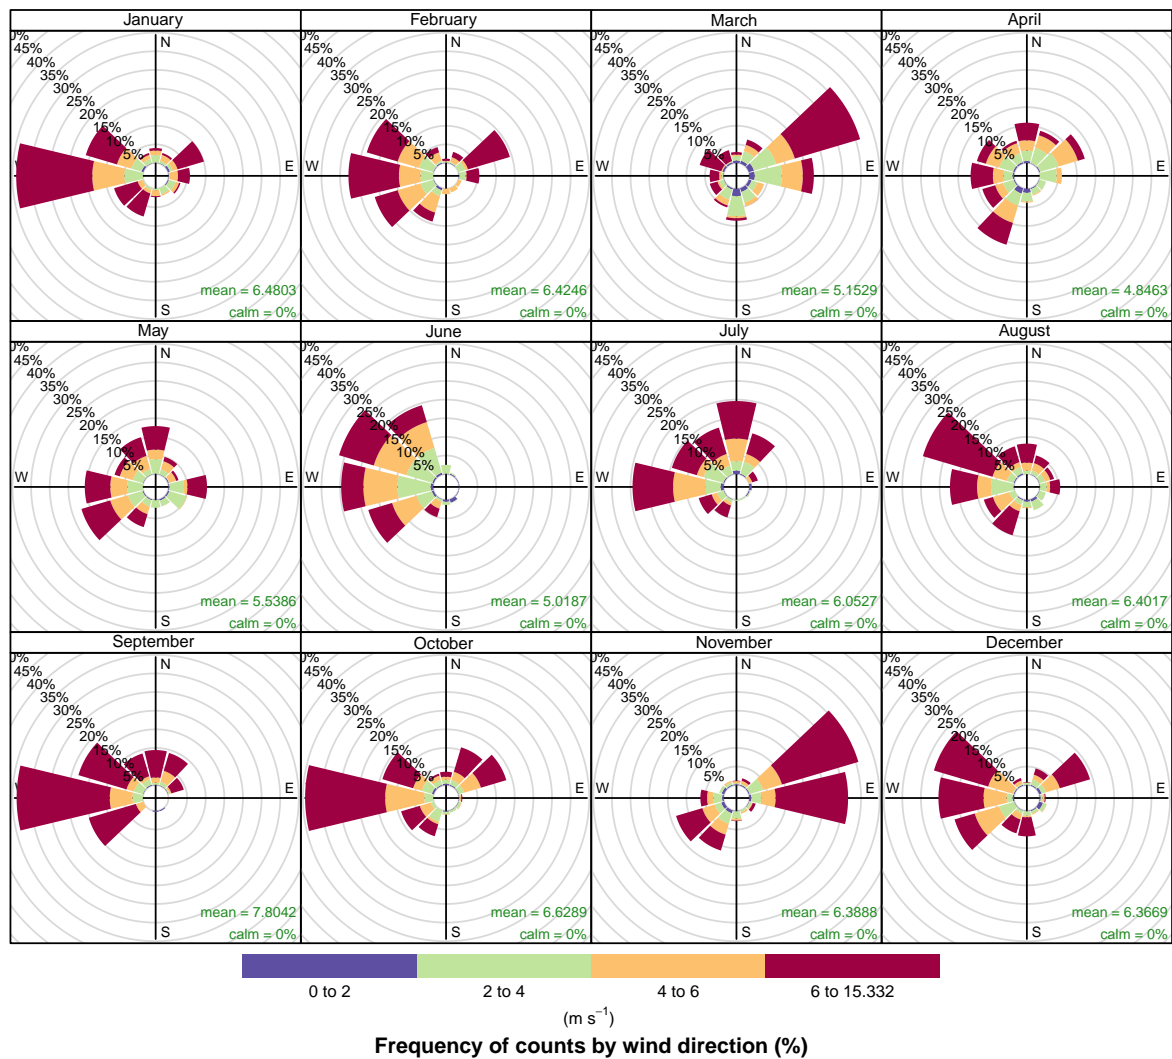

**Figure S37.** Wind rose Cape Grim location for 2017.

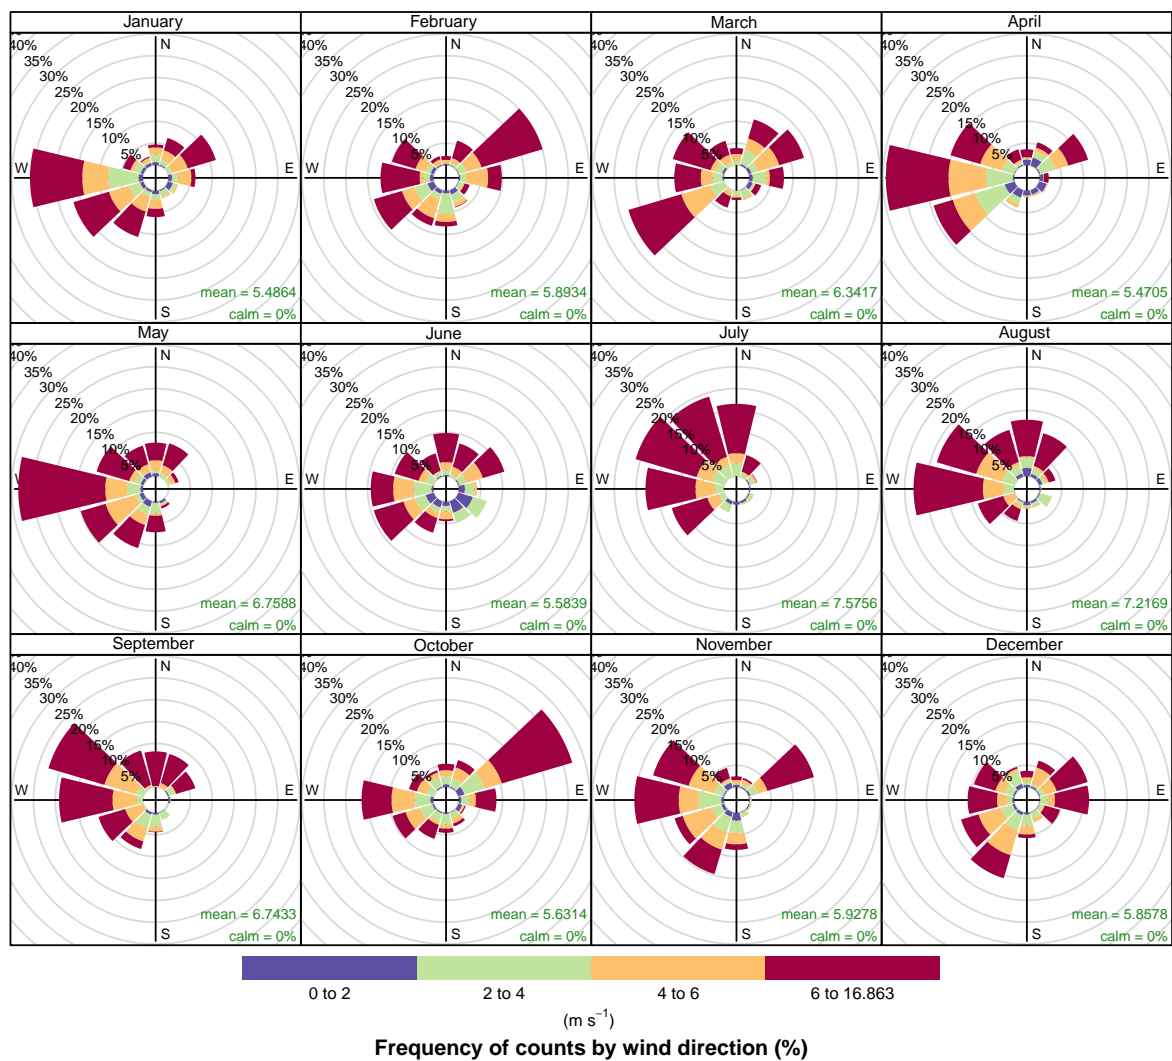

**Figure S38.** Wind rose Cape Grim location for 2018.

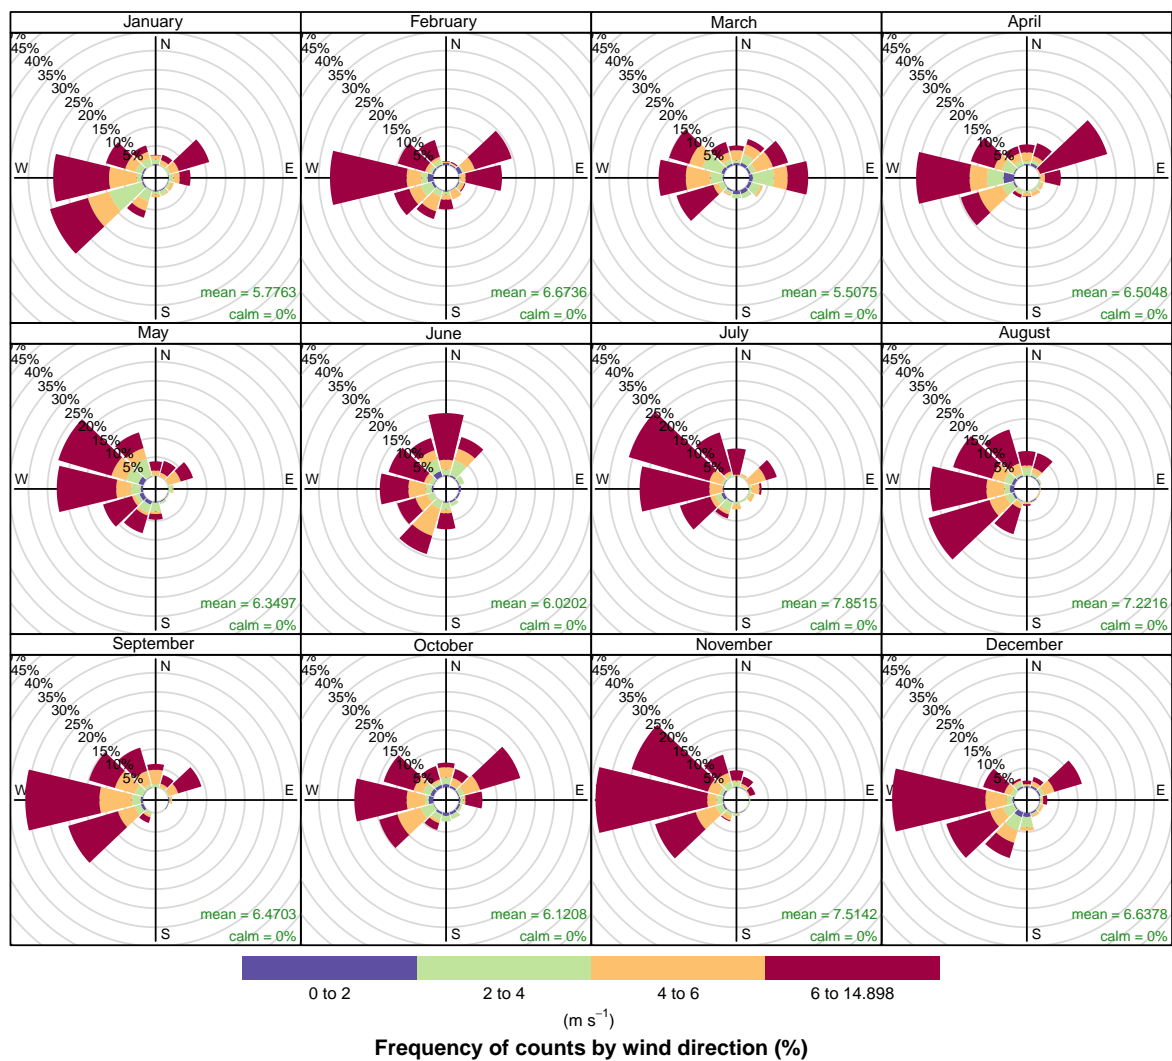

**Figure S39.** Wind rose Cape Grim location for 2019.
